# Supplementary material for: Characterization of Aminoacyl-tRNA Synthetases in Chromerids
Source: MDPI journal article supplement (doi:10.3390/genes10080582), 2019-07-31

# argRS

- Archaea
- α-Protobacteria
- Cyanobacteria
- Other Bacteria
- Eukaryotes, origin "eukaryotic"
- Eukaryotes, origin "mitochondrial"
- Eukaryotes, origin "plastidial"
- Eukaryotes, origin "bacterial/organelar"
- Eukaryotes, origin "unclear"

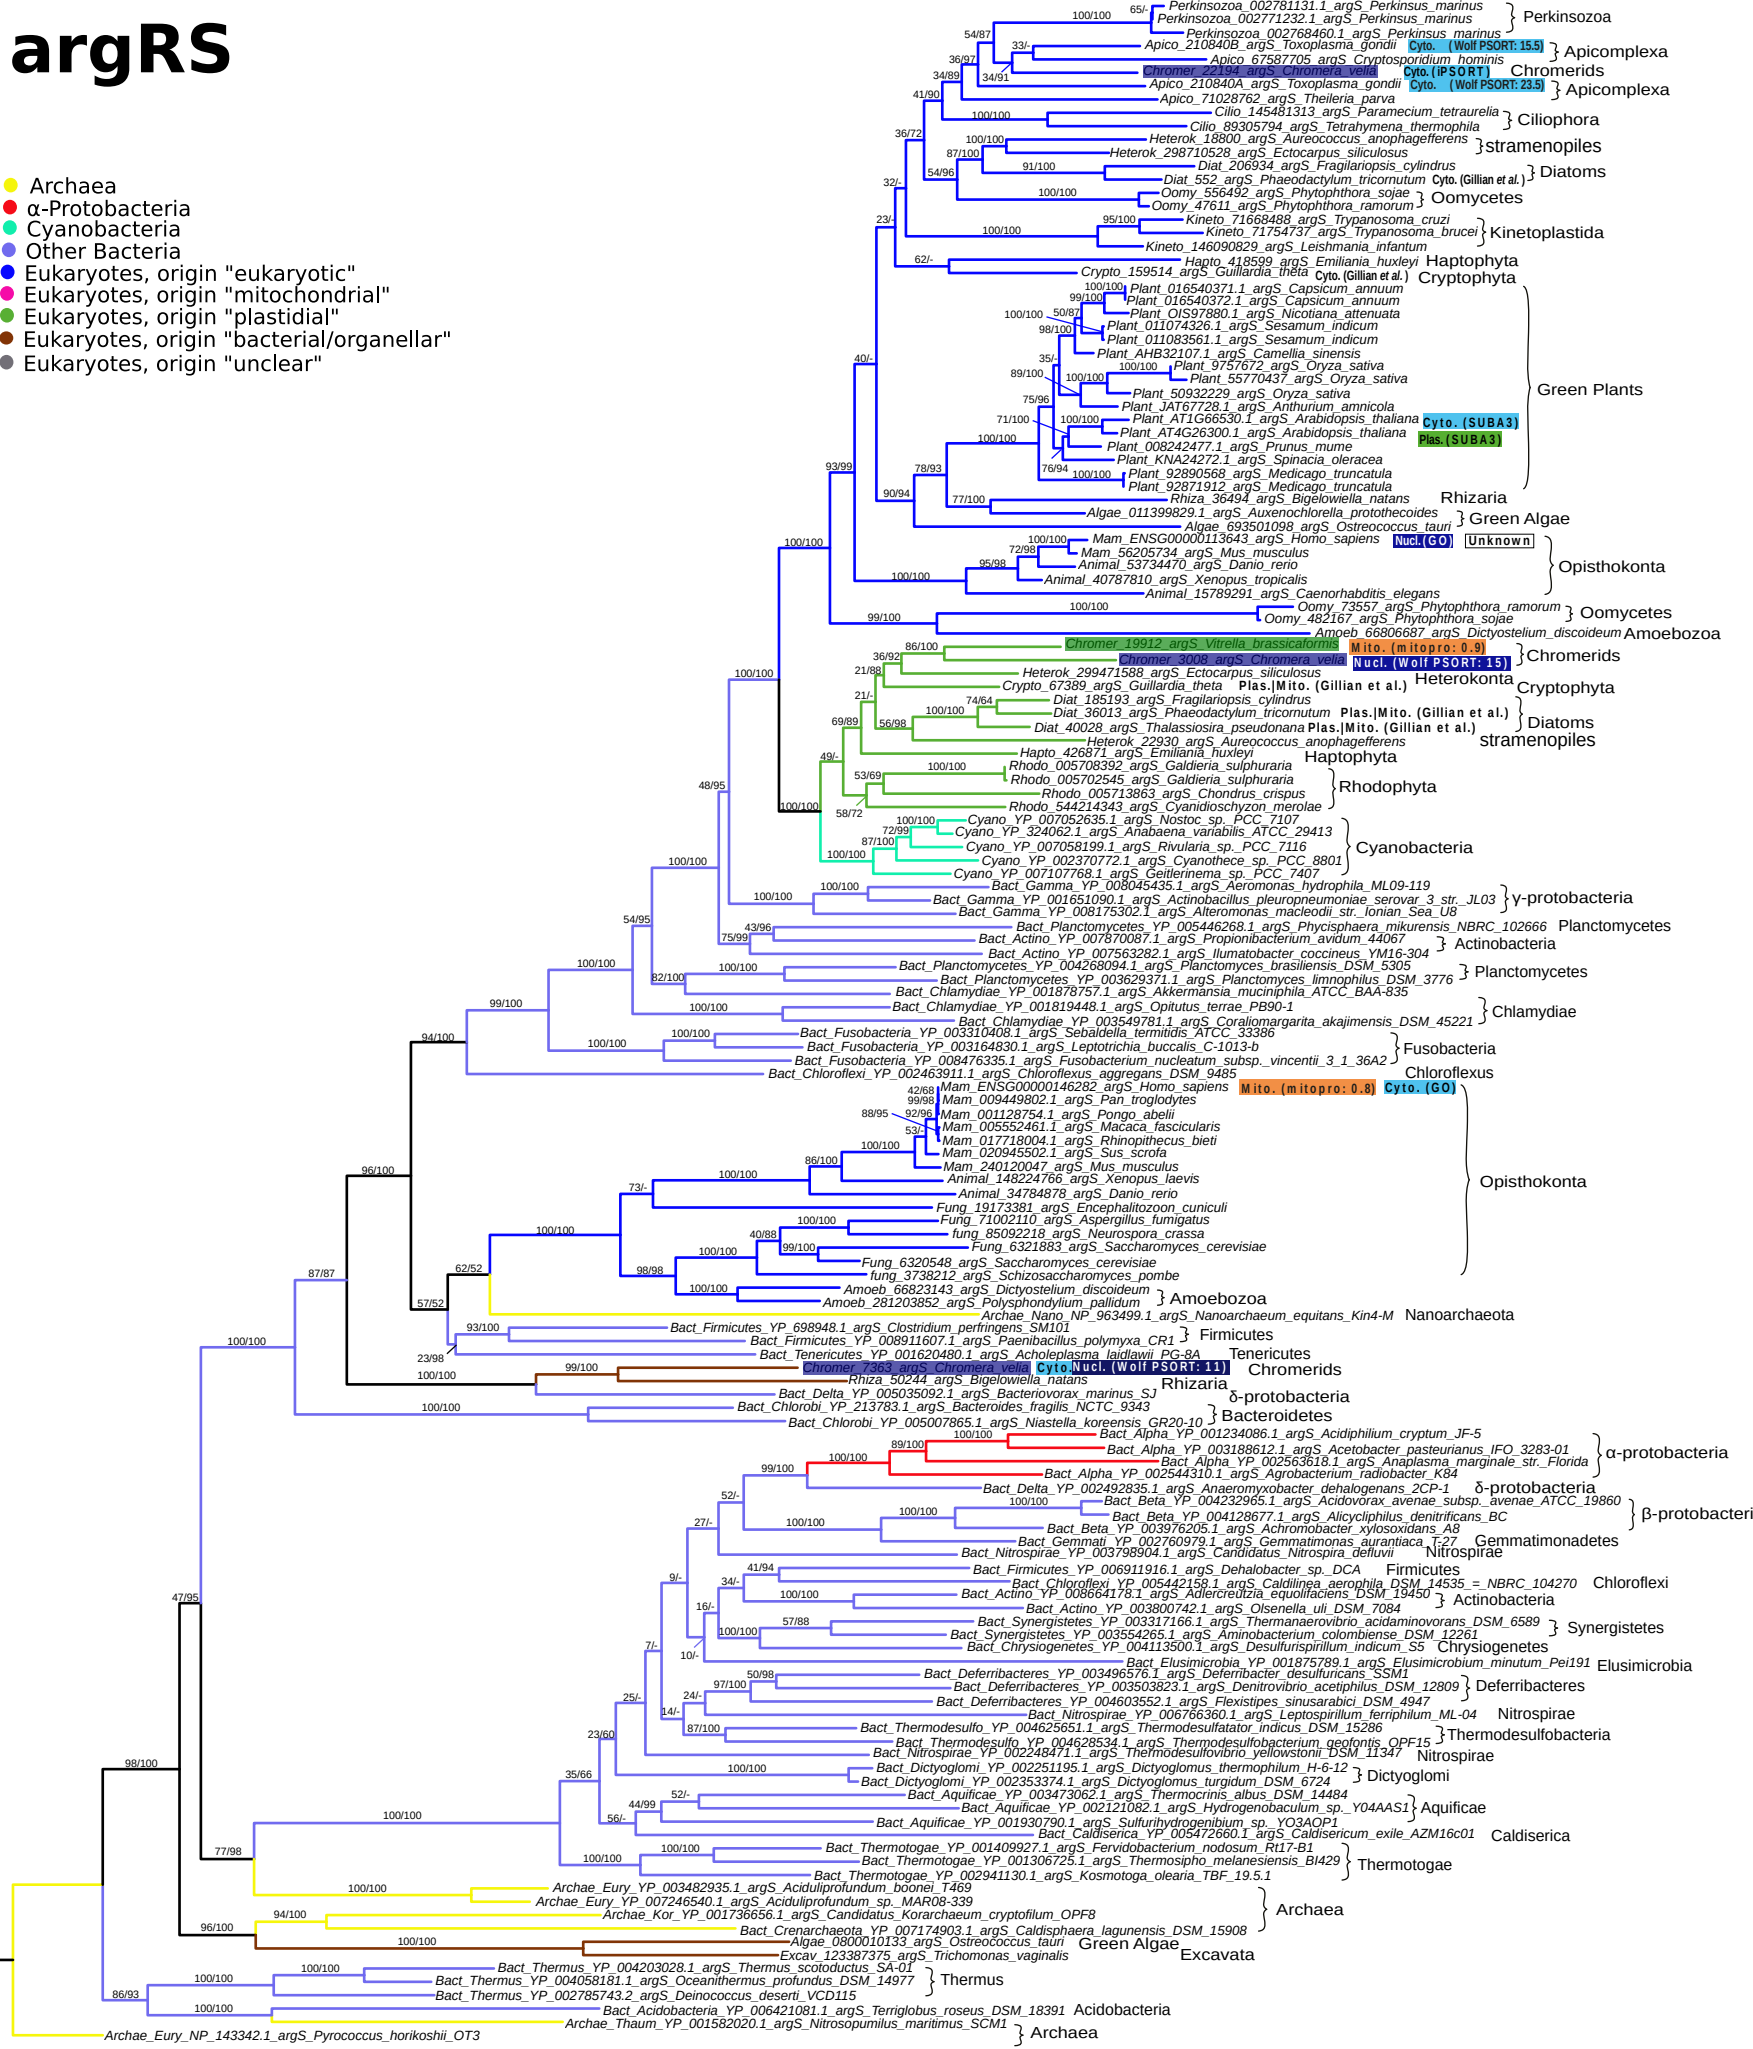

# cysRS

- Archaea
- α-Protobacteria
- Cyanobacteria
- Other Bacteria
- Eukaryotes, origin "eukaryotic"
- Eukaryotes, origin "mitochondrial"
- Eukaryotes, origin "plastidial"
- Eukaryotes, origin "bacterial/organelar"
- Eukaryotes, origin "unclear"

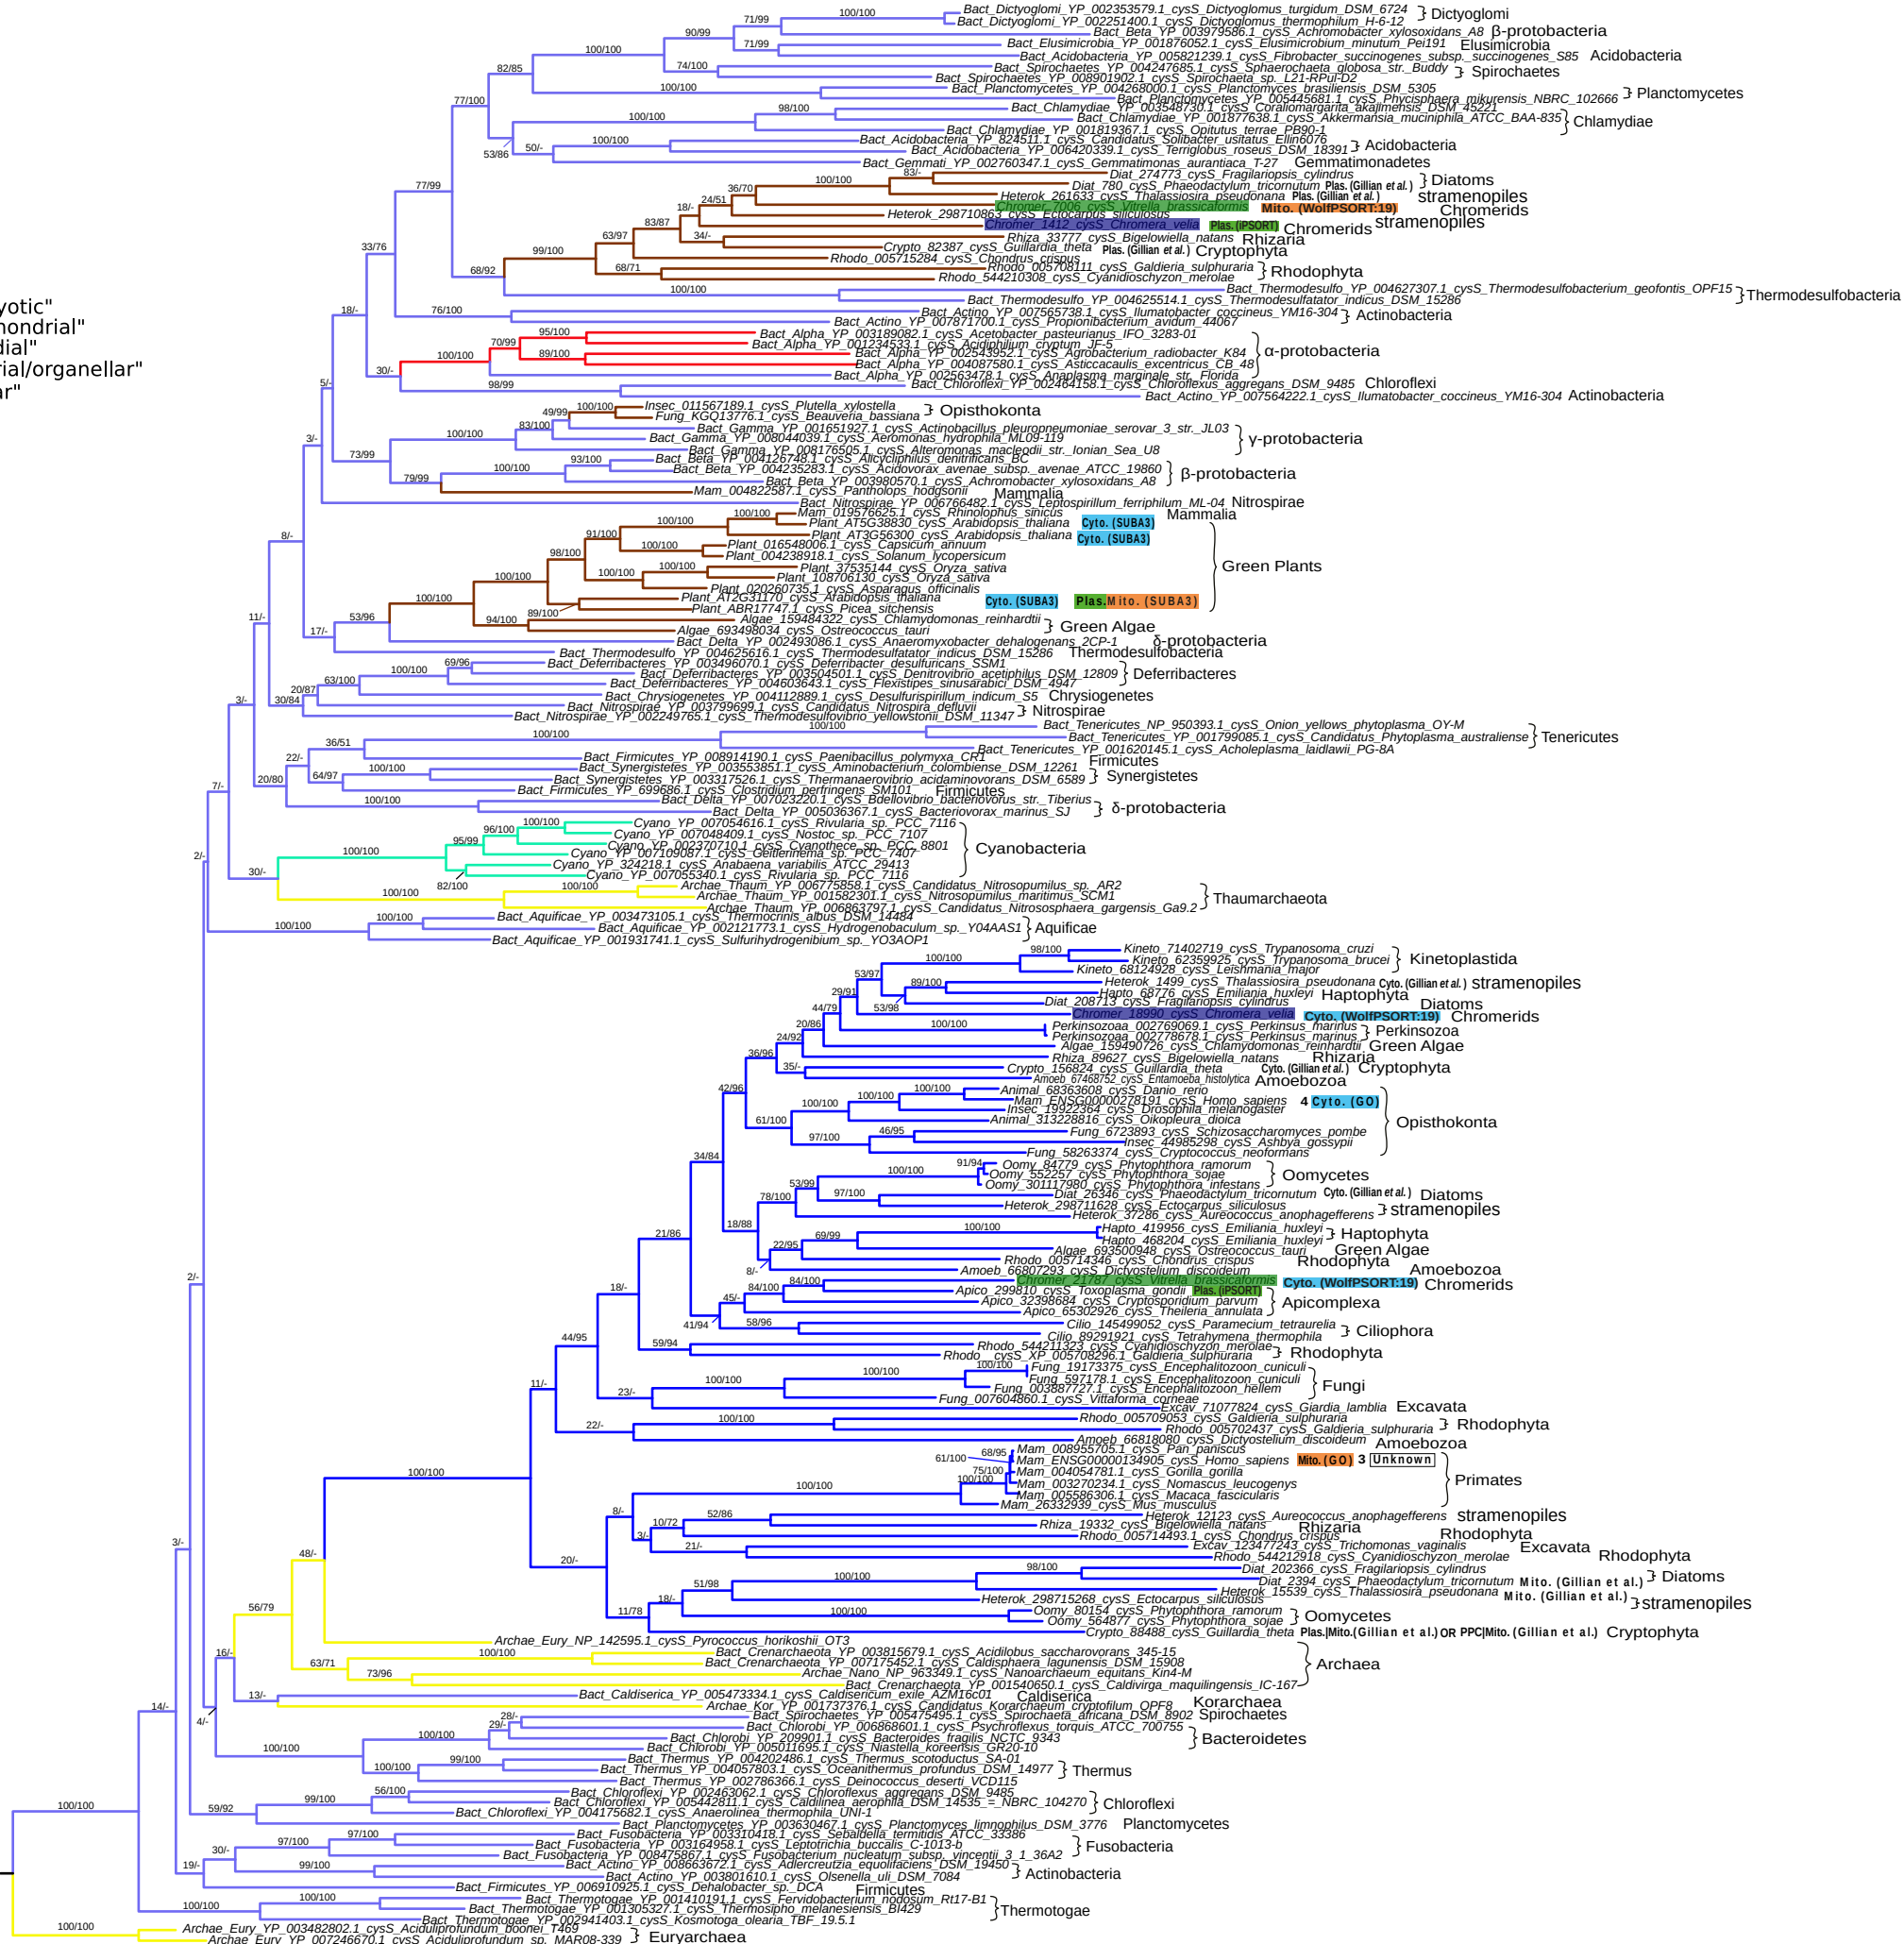

# gluRS

- Archaea
- α-Protobacteria
- Cyanobacteria
- Other Bacteria
- Eukaryotes, origin "eukaryotic"
- Eukaryotes, origin "mitochondrial"
- Eukaryotes, origin "plastidial"
- Eukaryotes, origin "bacterial/organellar"
- Eukaryotes, origin "unclear"

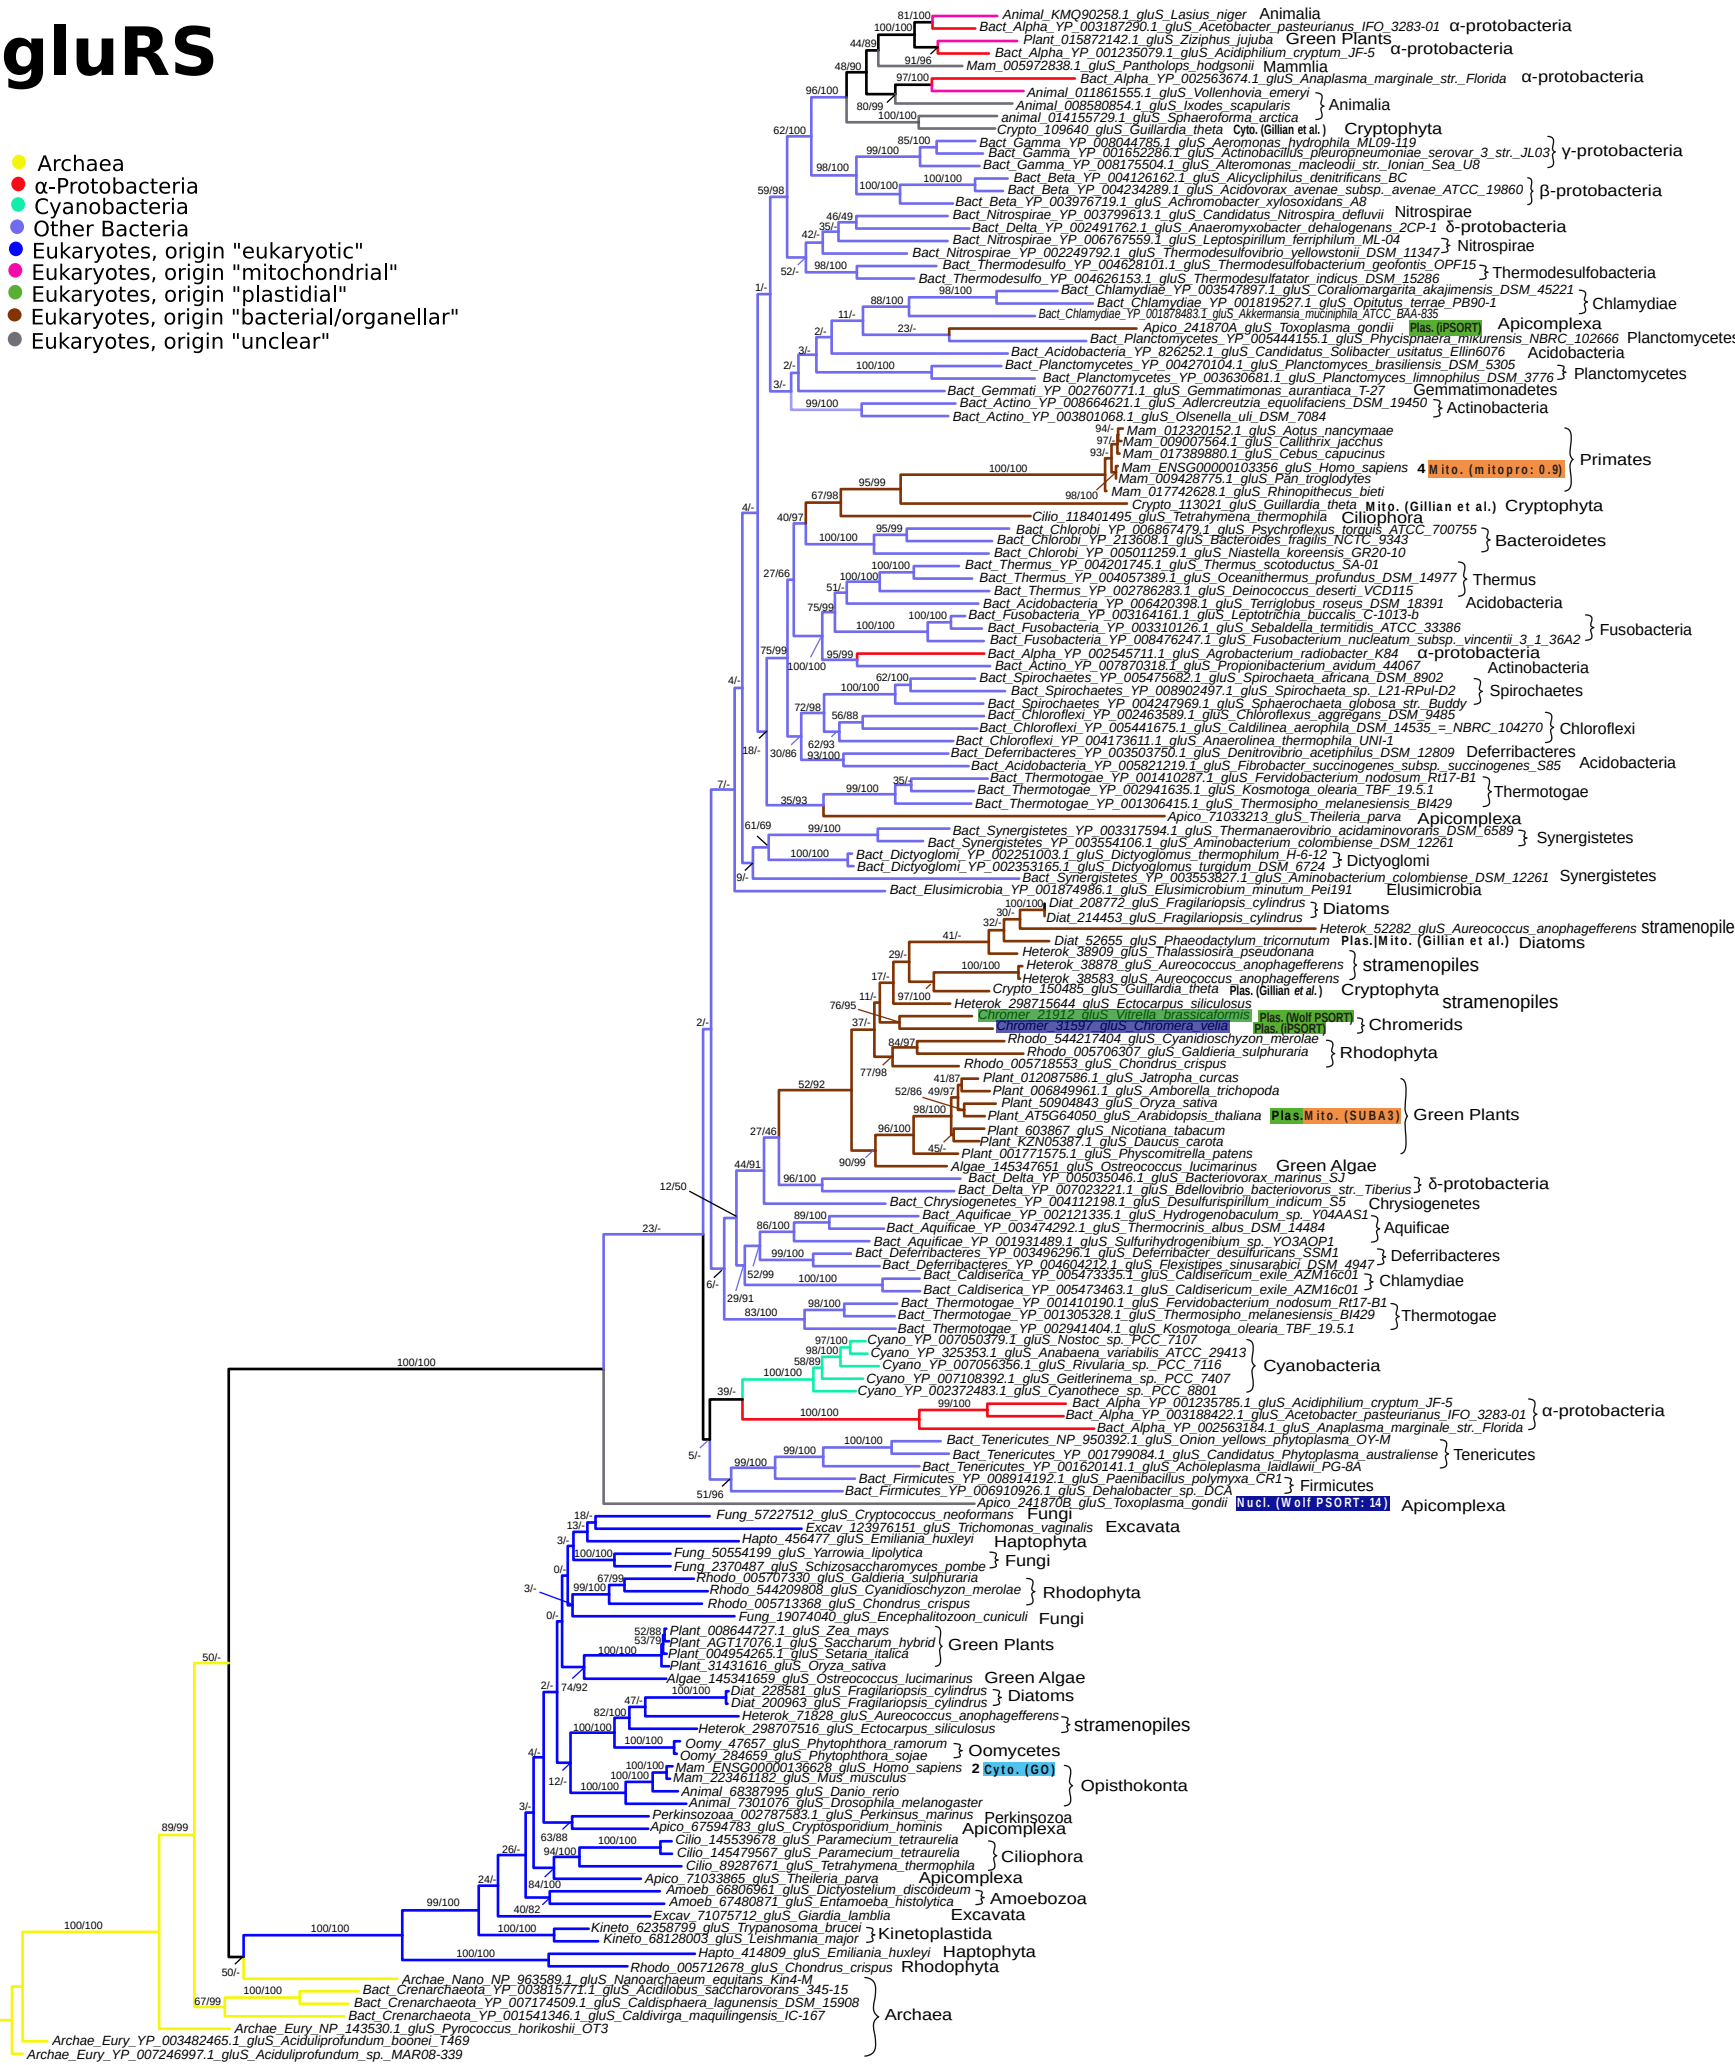

glnRS

- Archaea
- α-Protobacteria
- Cyanobacteria
- Other Bacteria
- Eukaryotes, origin "eukaryotic"
- Eukaryotes, origin "mitochondrial"
- Eukaryotes, origin "plastidial"
- Eukaryotes, origin "bacterial/organelar"
- Eukaryotes, origin "unclear"

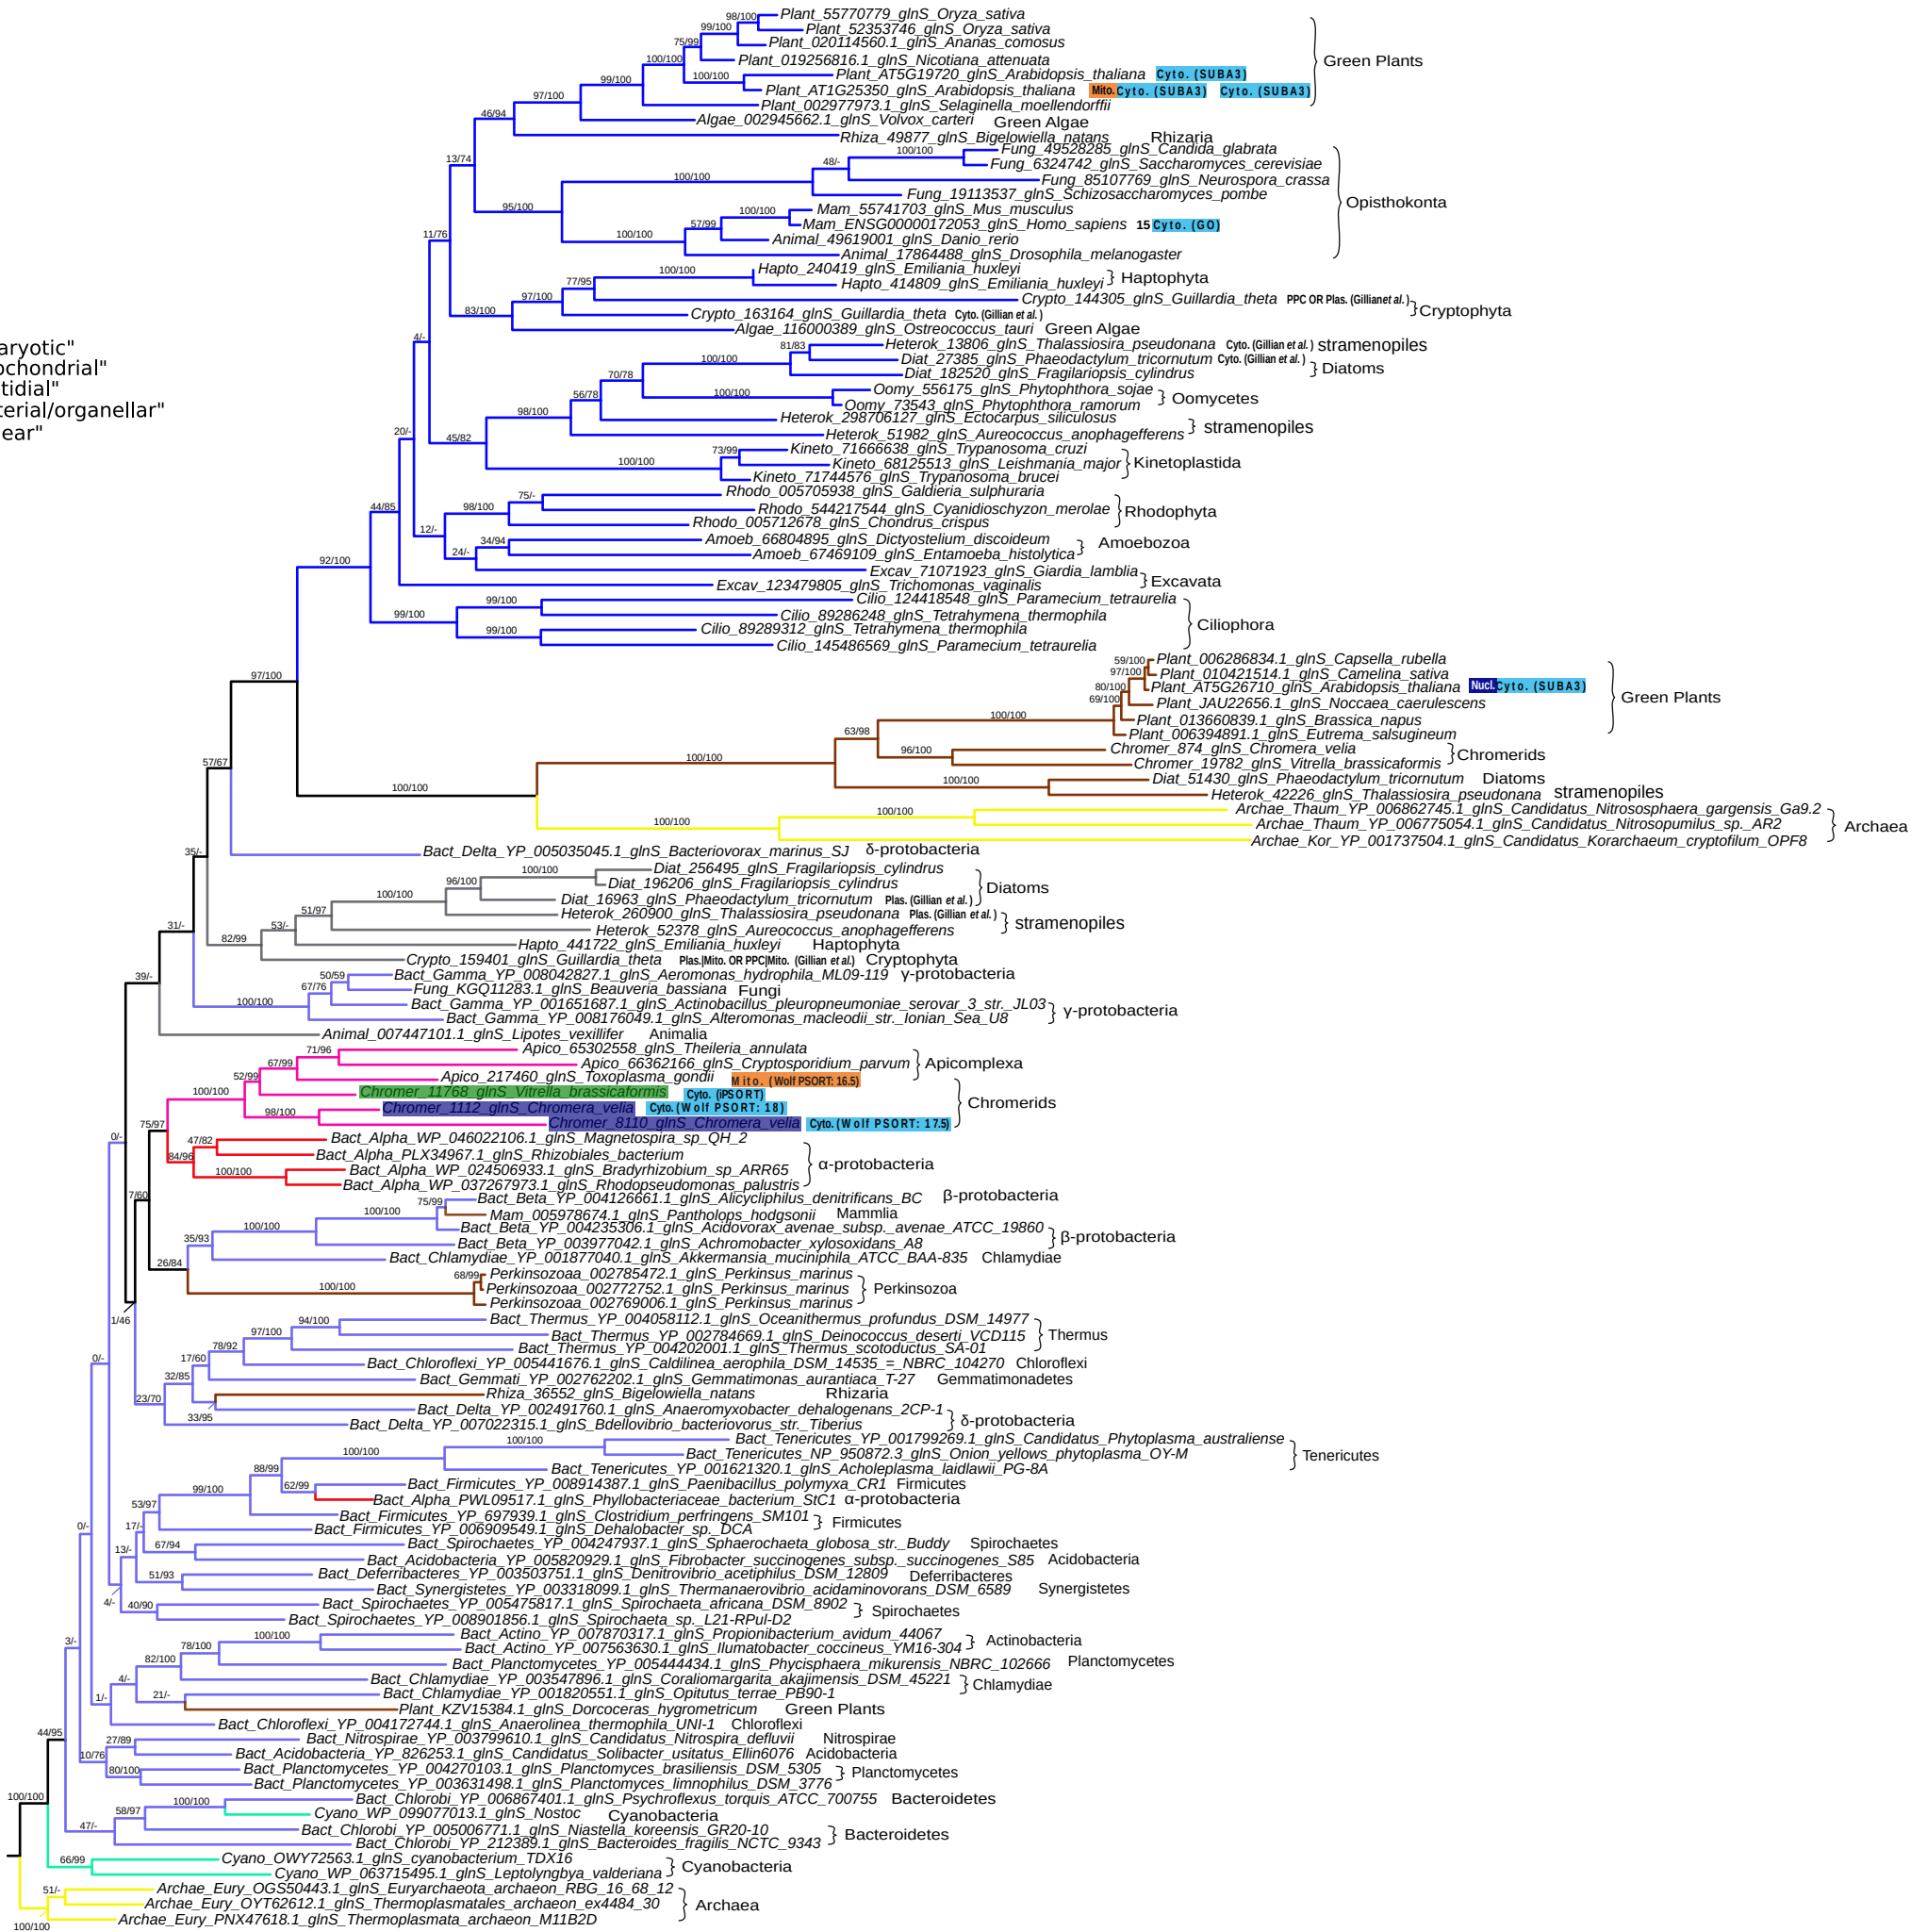

- Archaea
- α-Protobacteria
- Cyanobacteria
- Other Bacteria
- Eukaryotes, origin "eukaryotic"
- Eukaryotes, origin "mitochondrial"
- Eukaryotes, origin "plastidial"
- Eukaryotes, origin "bacterial/organellar"
- Eukaryotes, origin "unclear"

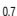

# ileRS

- Archaea
- α-Protobacteria
- Cyanobacteria
- Other Bacteria
- Eukaryotes, origin "eukaryotic"
- Eukaryotes, origin "mitochondrial"
- Eukaryotes, origin "plastidial"
- Eukaryotes, origin "bacterial/organellar"
- Eukaryotes, origin "unclear"

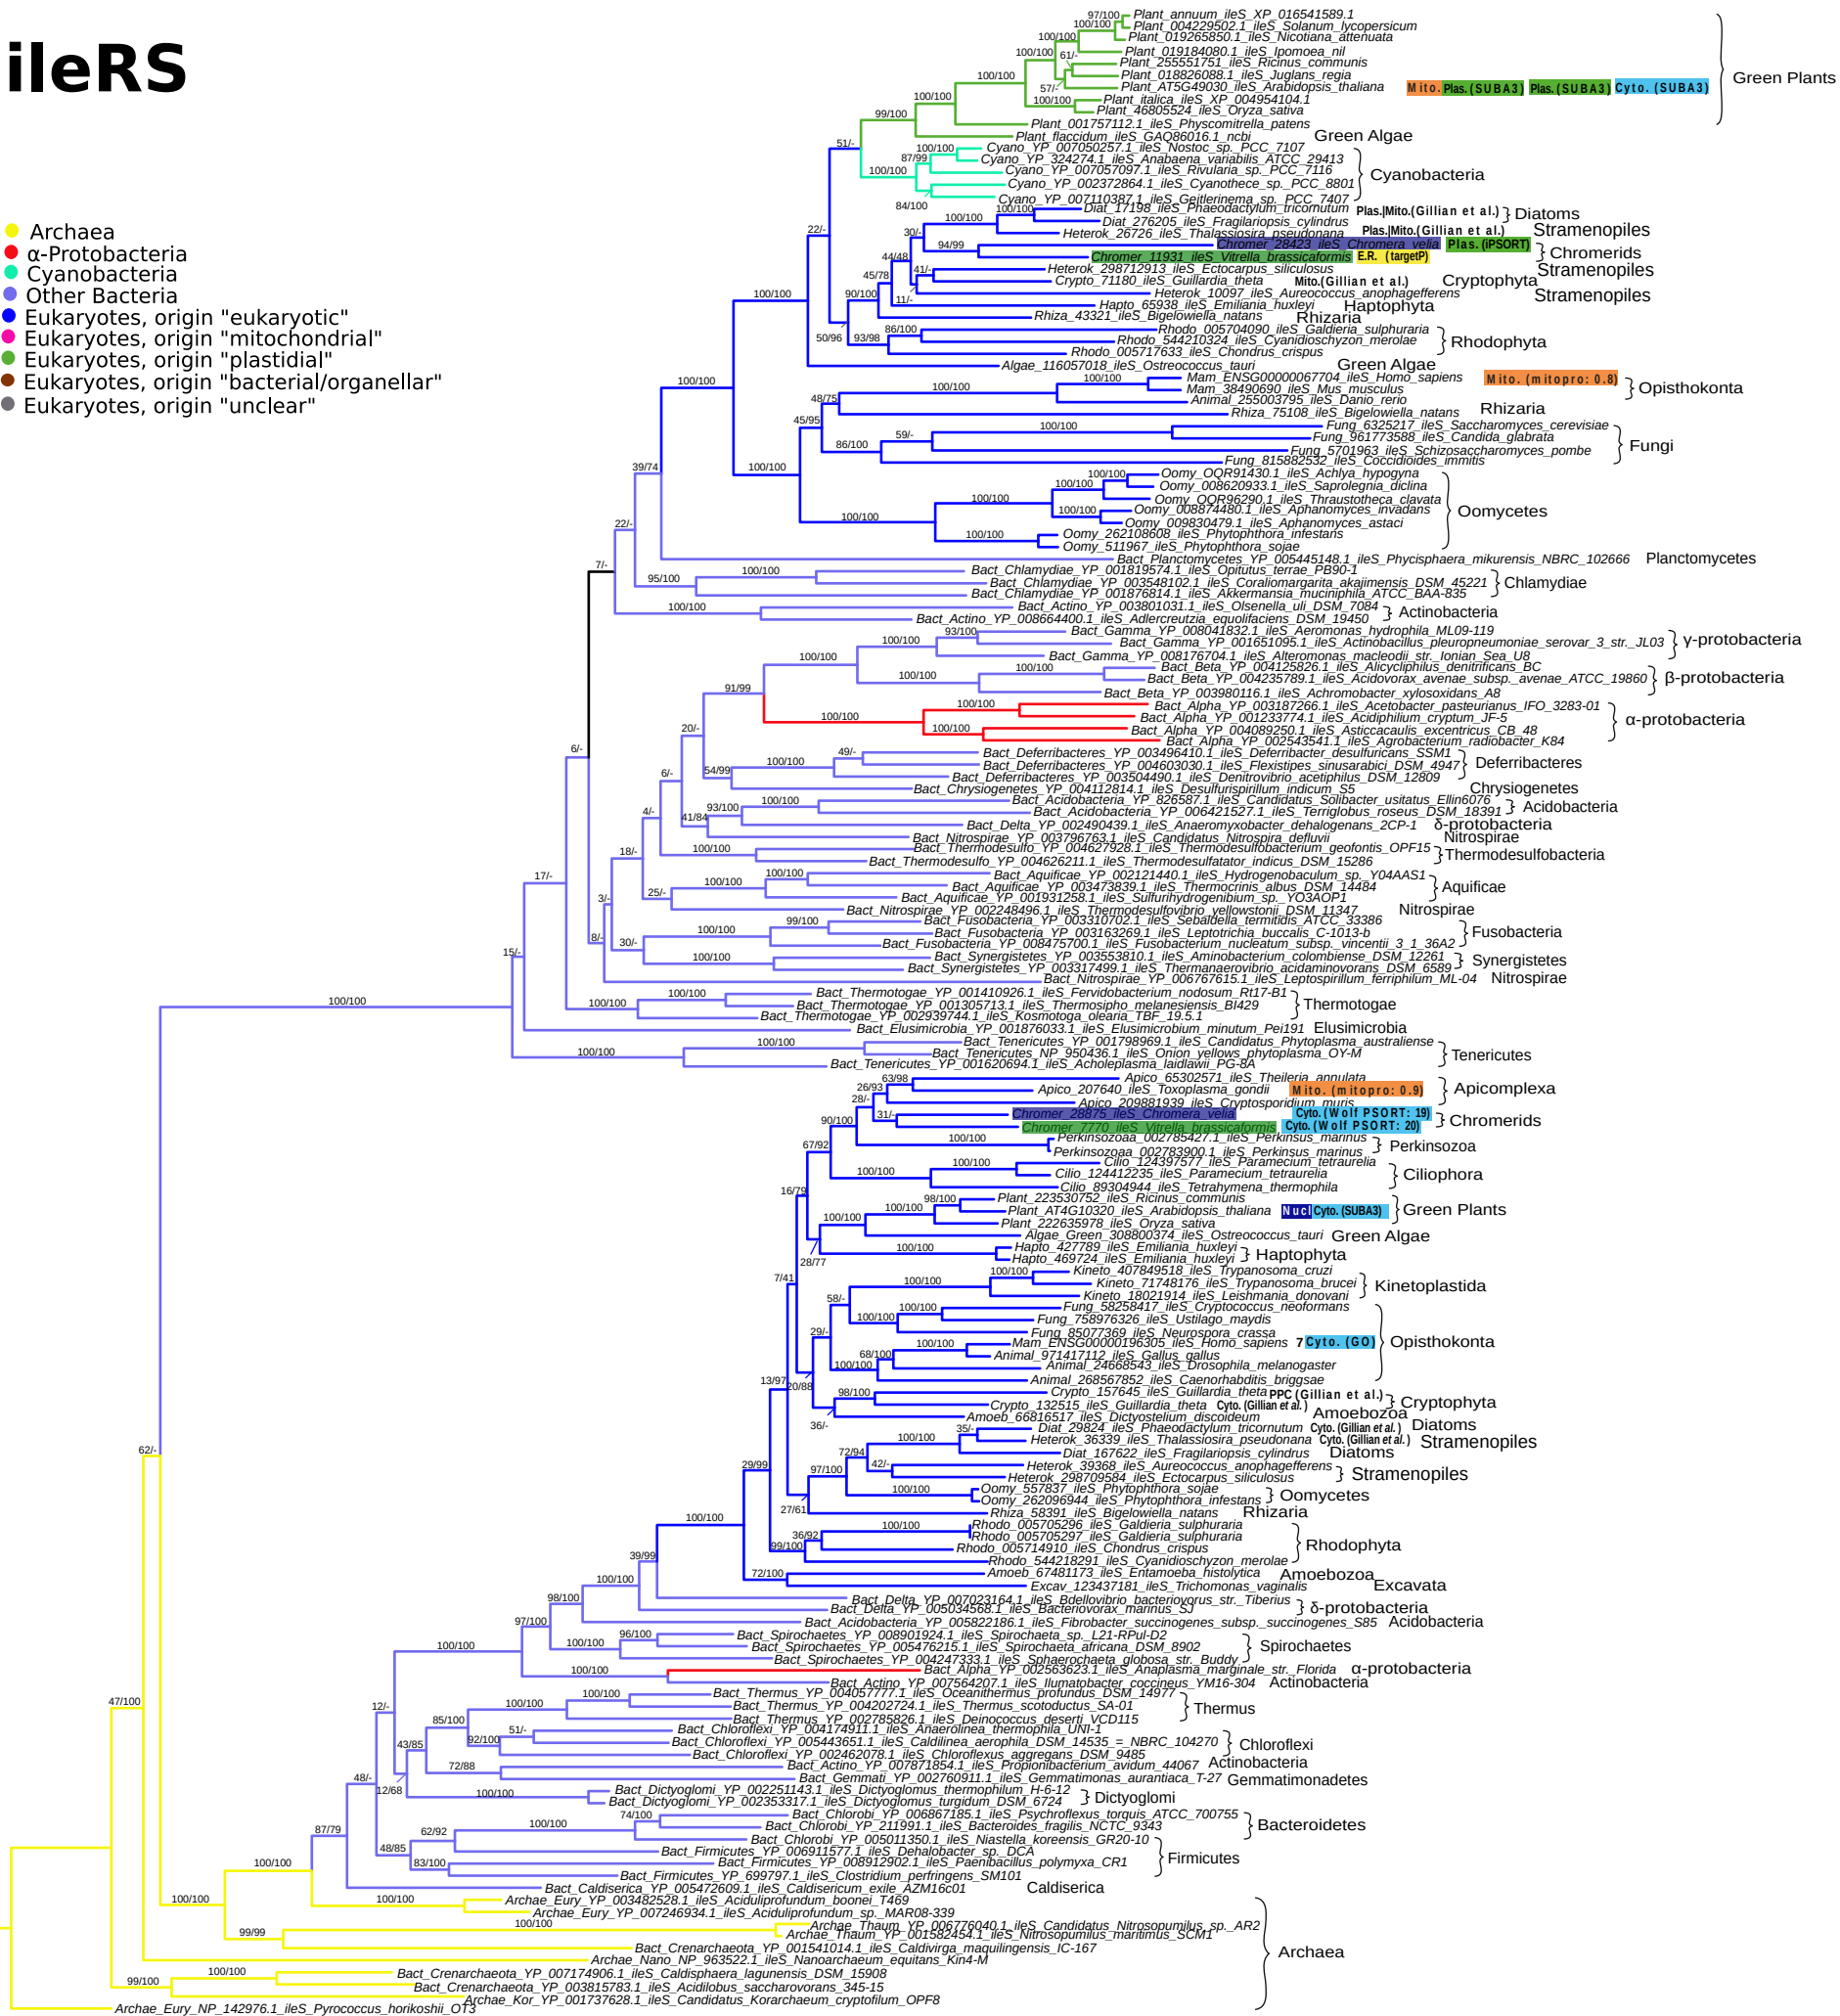

- Archaea
- $\alpha$ -Proteobacteria
- Cyanobacteria
- Other Bacteria
- Eukaryotes, origin "eukaryotic"
- Eukaryotes, origin "mitochondrial"
- Eukaryotes, origin "plastidial"
- Eukaryotes, origin "bacterial/organellar"
- Eukaryotes, origin "unclear"

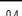

tyrRS

- Archaea
- α-Protobacteria
- Cyanobacteria
- Other Bacteria
- Eukaryotes, origin "eukaryotic"
- Eukaryotes, origin "mitochondrial"
- Eukaryotes, origin "plastidal"
- Eukaryotes, origin "bacterial/organellar"
- Eukaryotes origin "unclear"

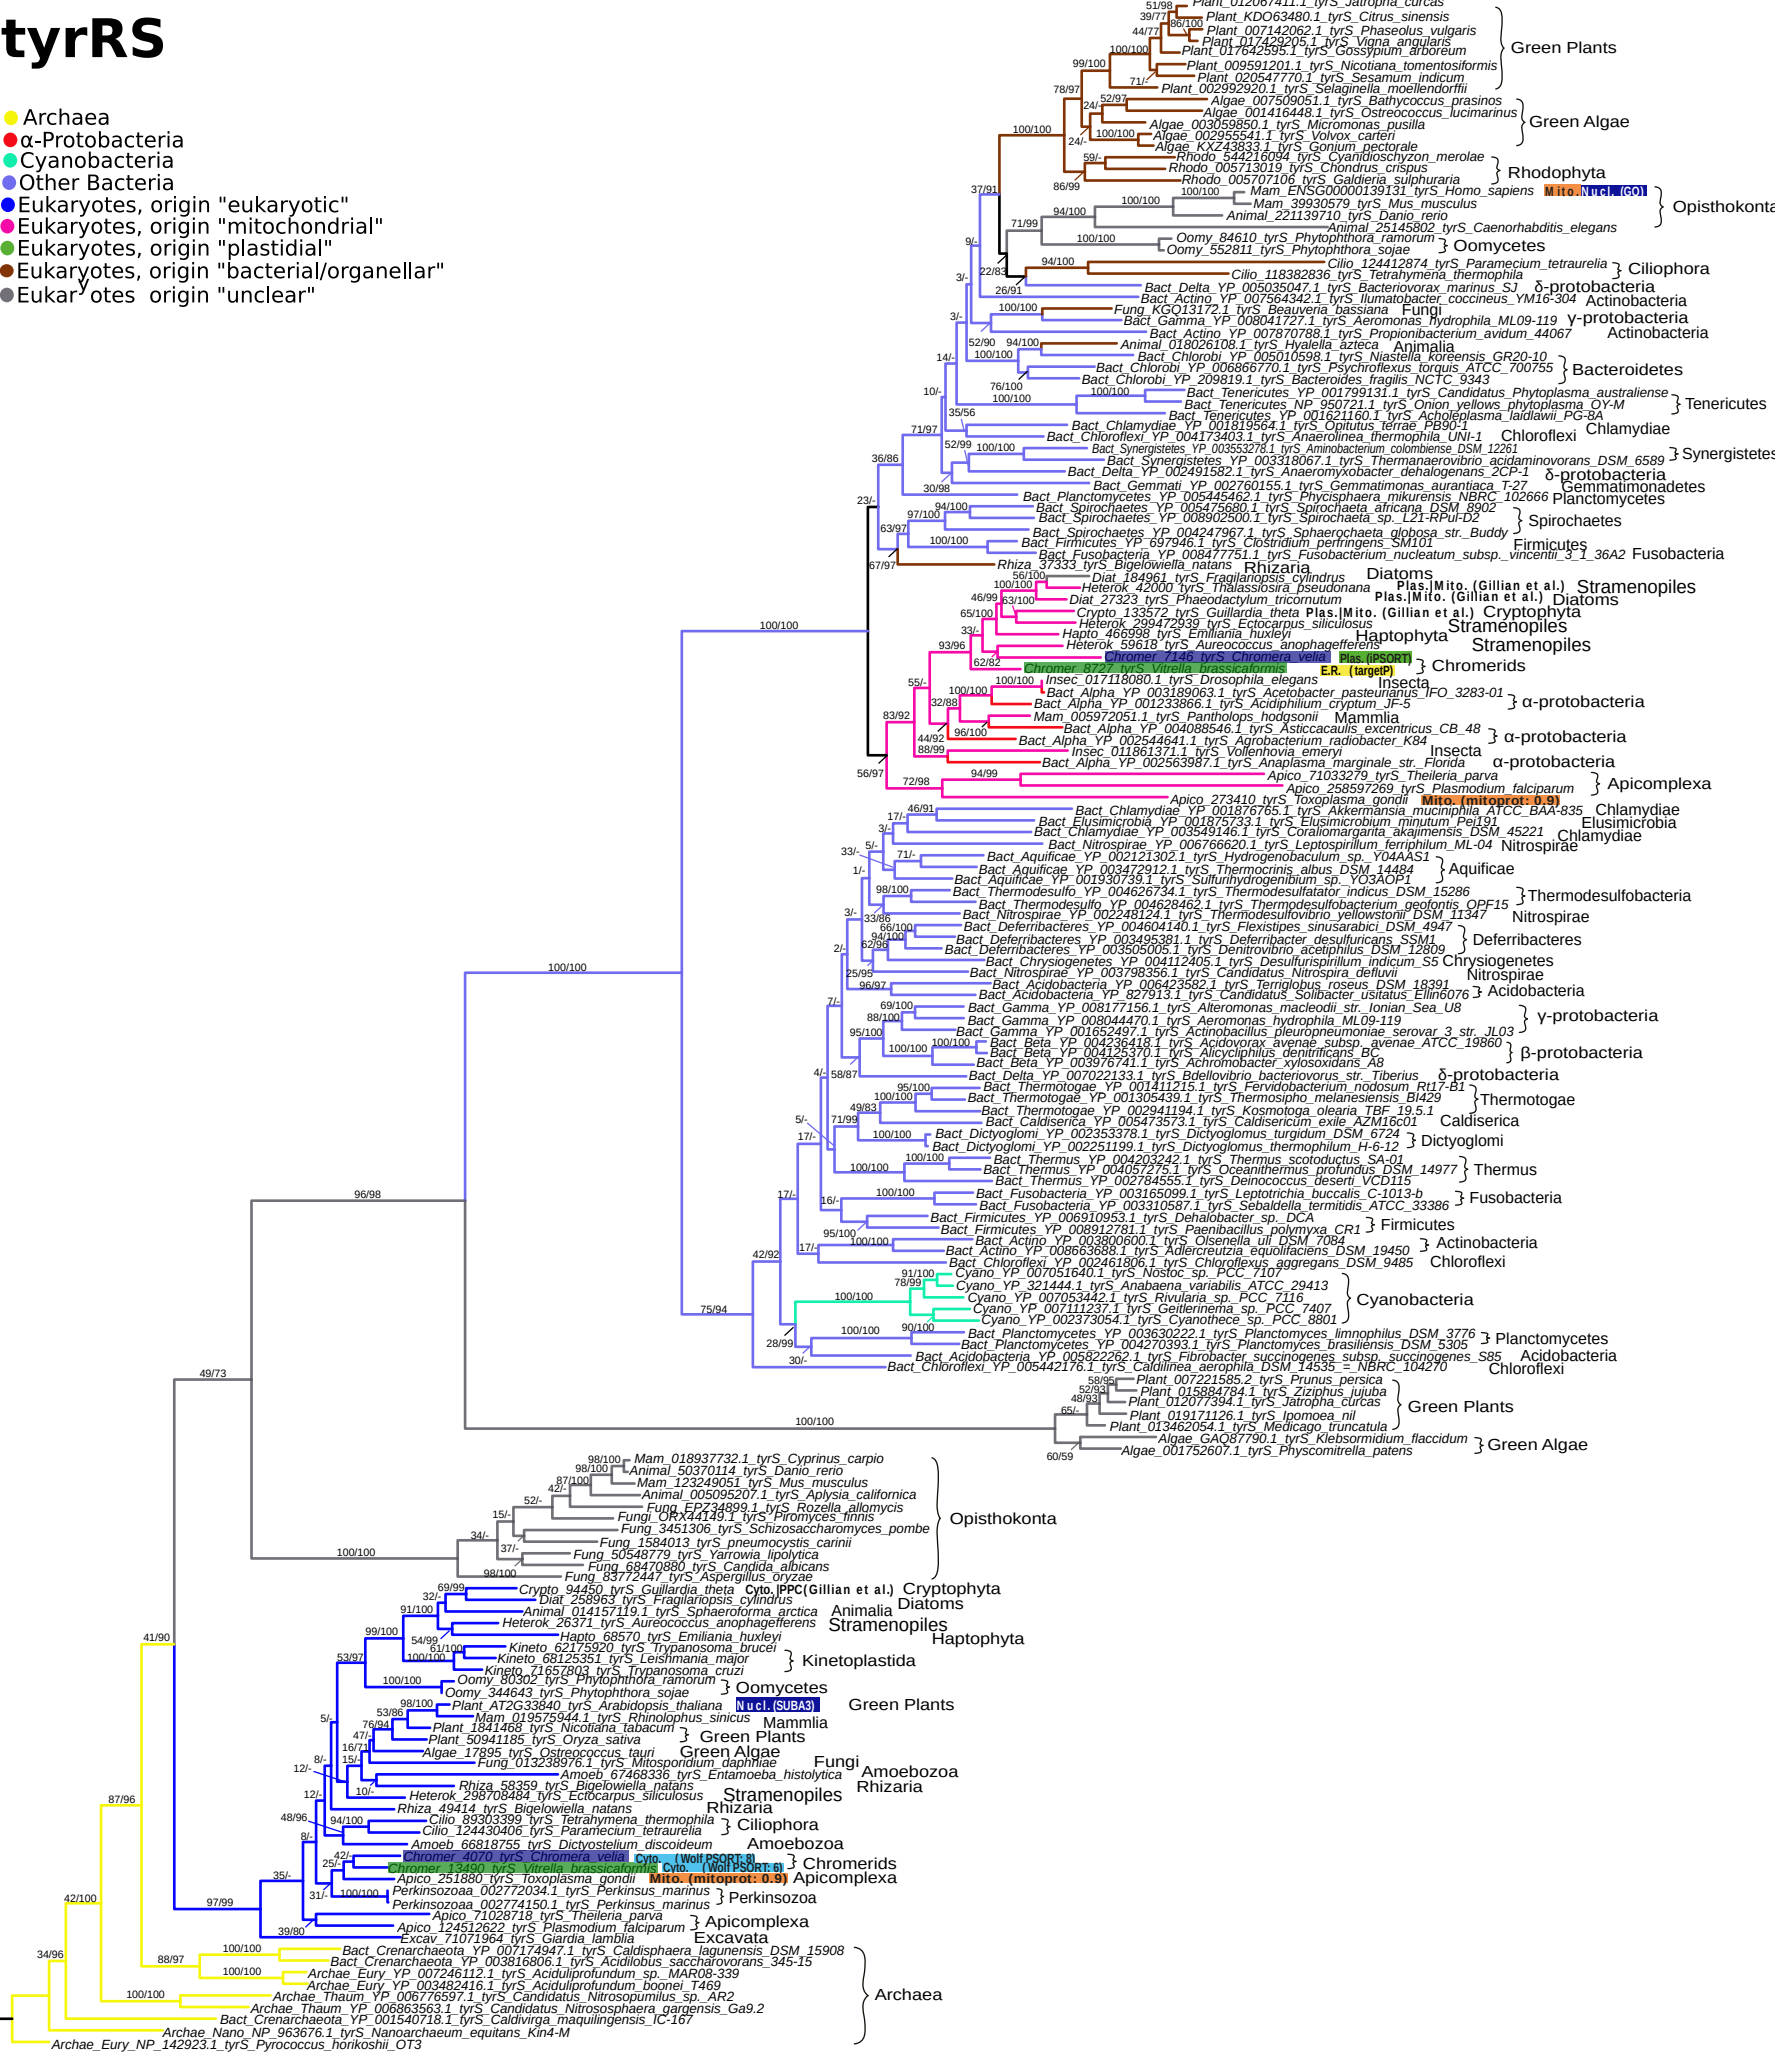

- Archaea
- α-Protobacteria
- Cyanobacteria
- Other Bacteria
- Eukaryotes, origin "eukaryotic"
- Eukaryotes, origin "mitochondrial"
- Eukaryotes, origin "plastidial"
- Eukaryotes, origin "bacterial/organellar"
- Eukaryotes, origin "unclear"

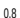

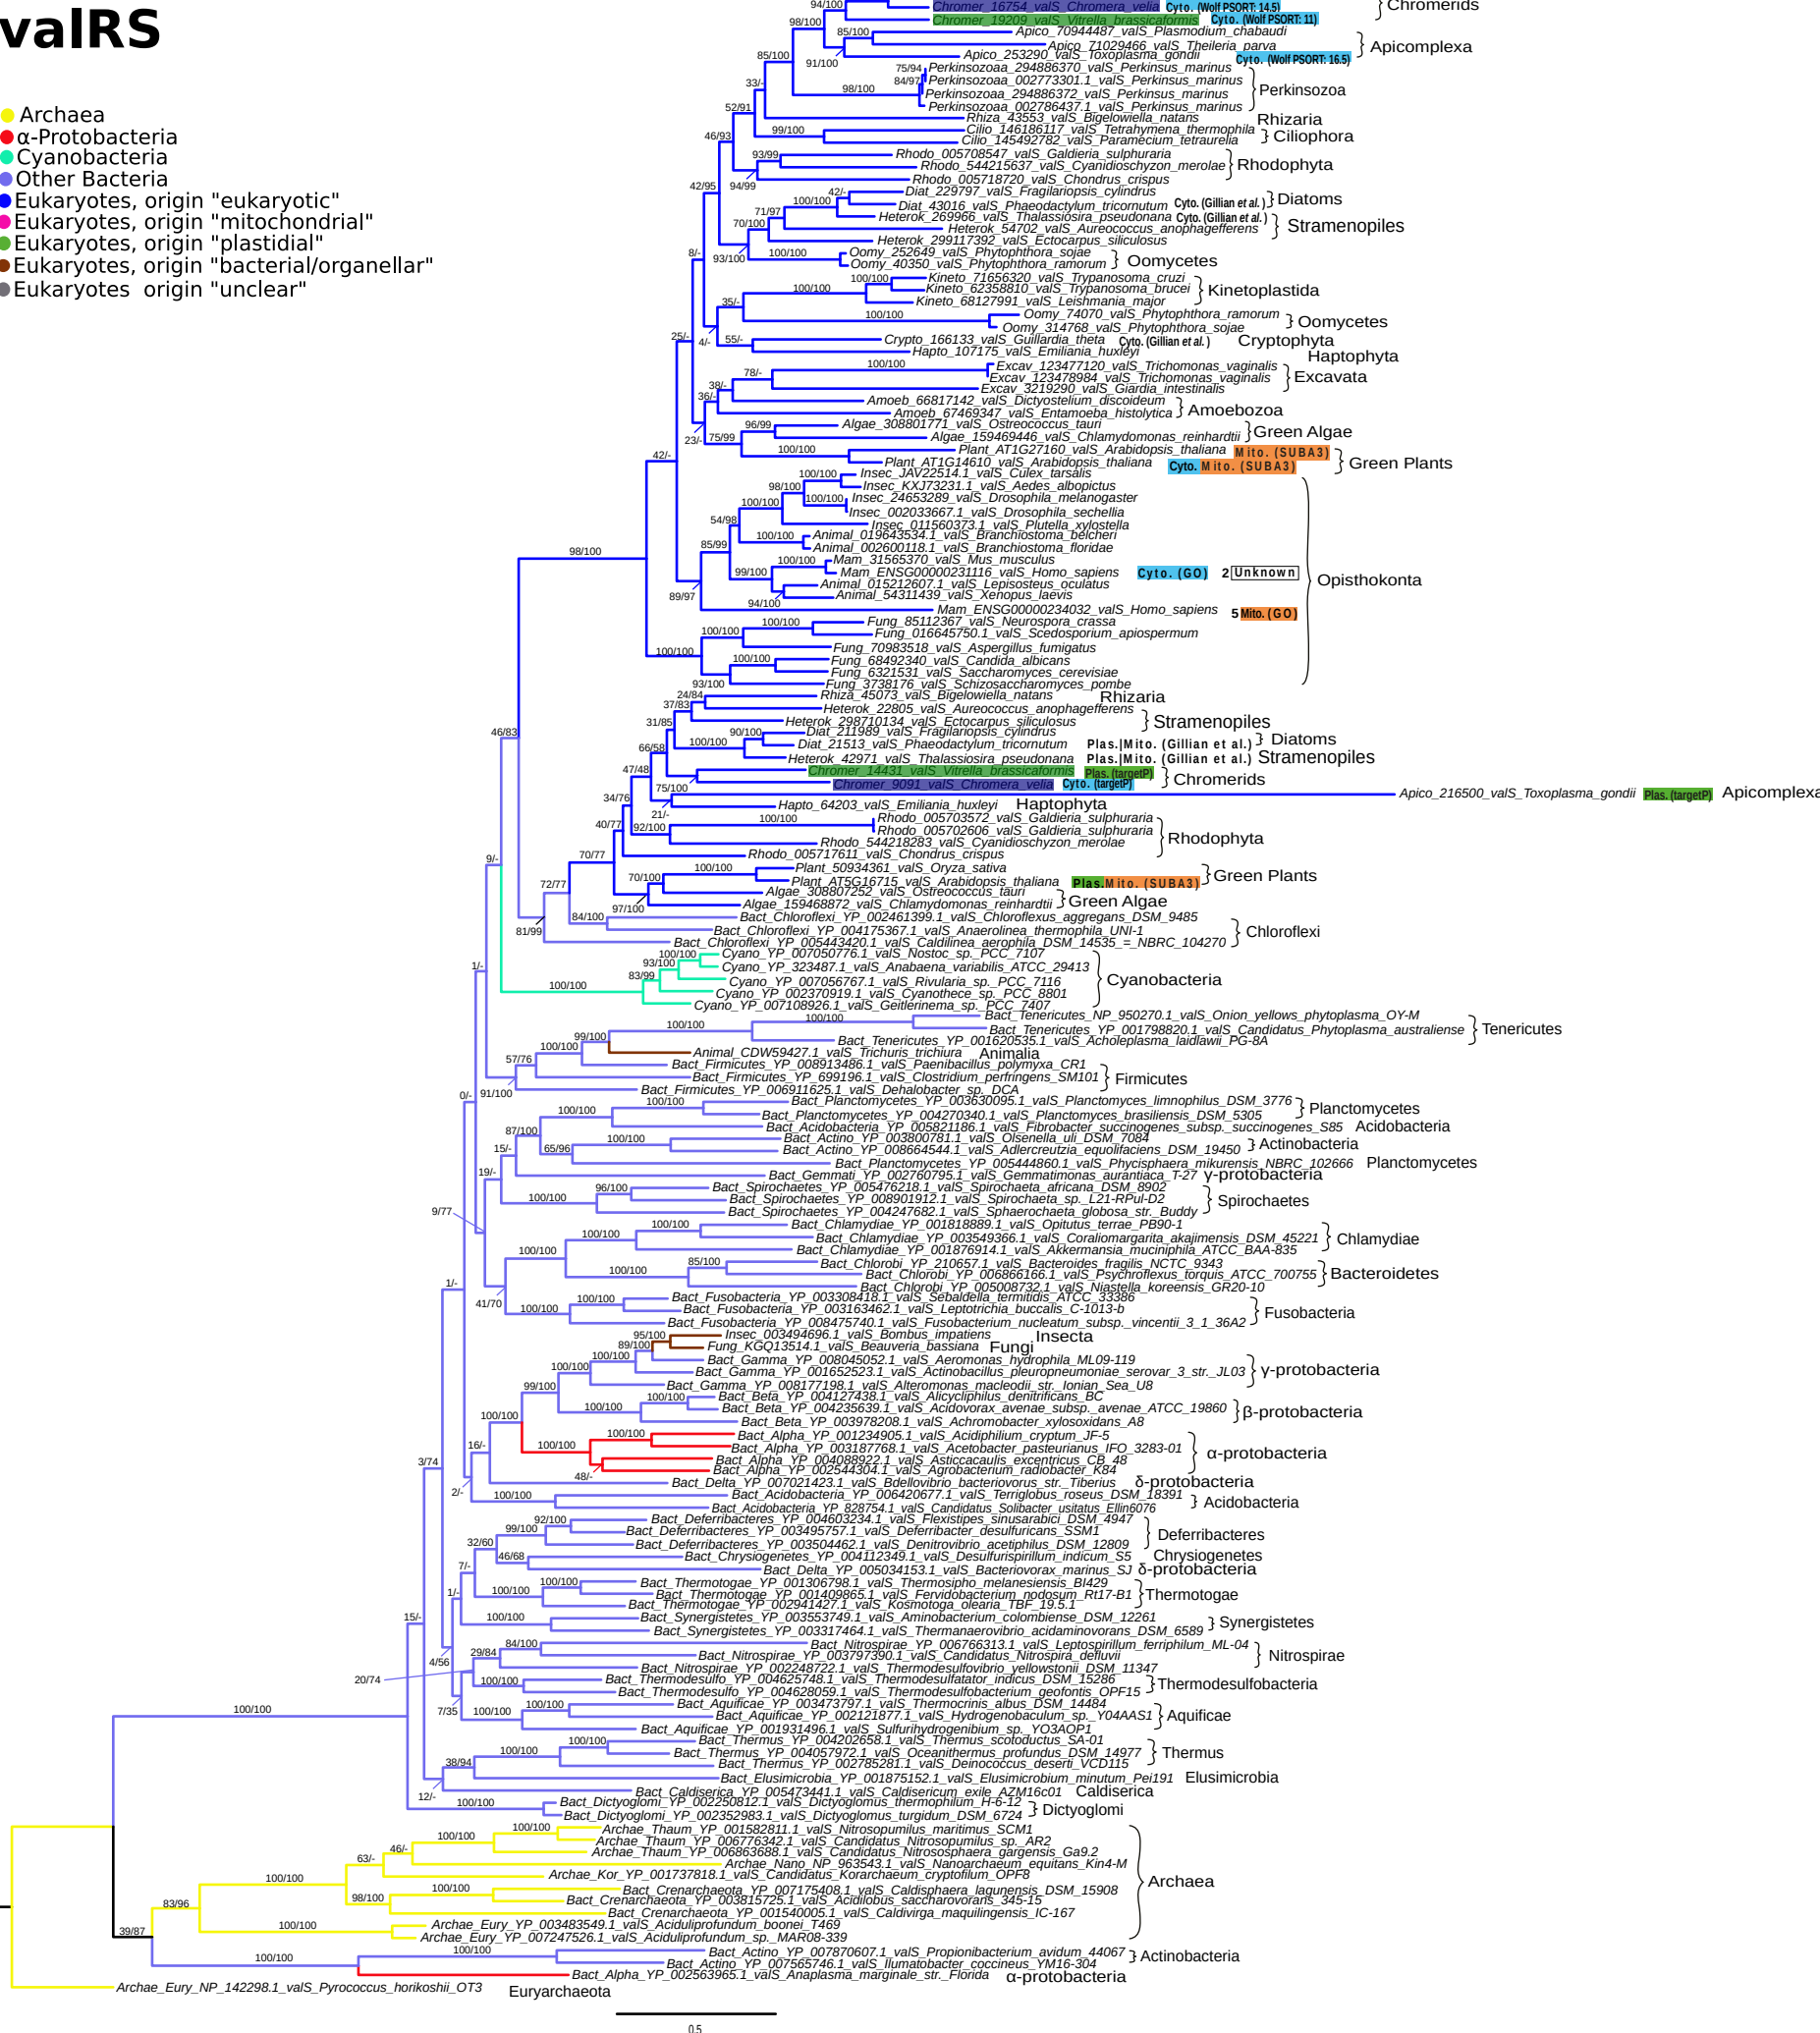

- Archaea
- α-Protobacteria
- Cyanobacteria
- Other Bacteria
- Eukaryotes, origin "eukaryotic"
- Eukaryotes, origin "mitochondrial"
- Eukaryotes, origin "plastidial"
- Eukaryotes, origin "bacterial/organellar"
- Eukaryotes, origin "unclear"

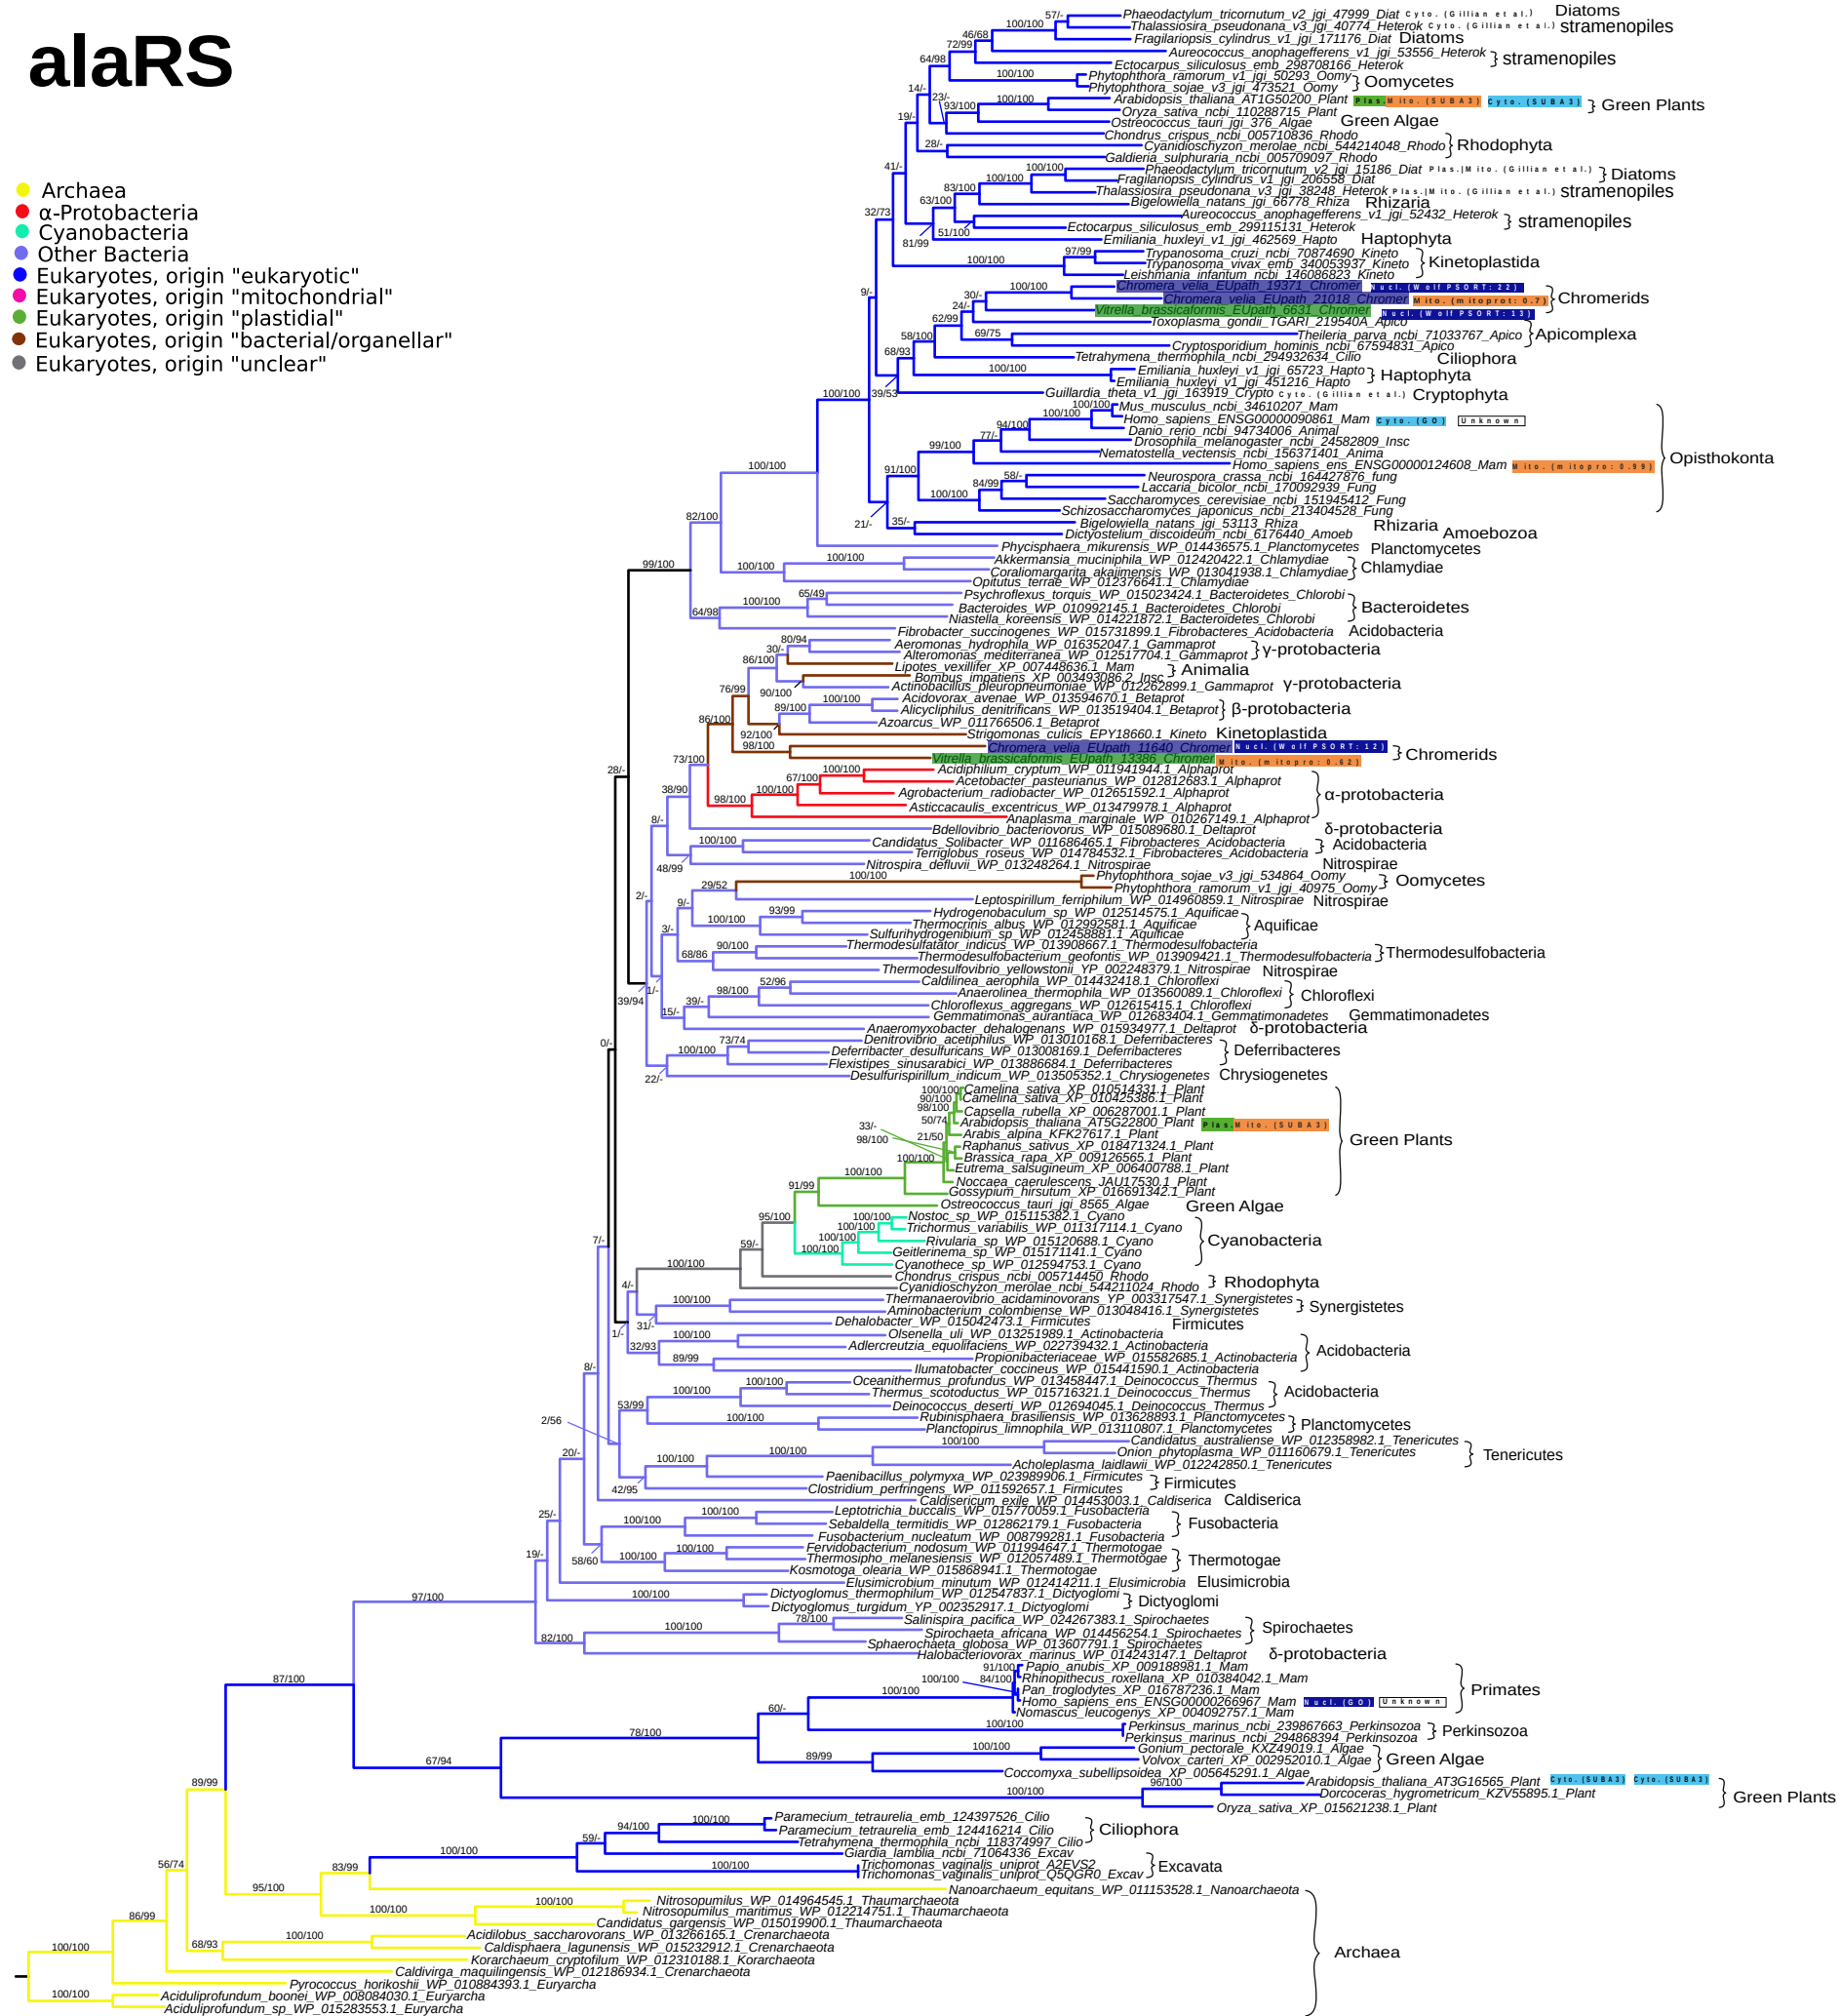

# aspRS

- Archaea
- α-Protobacteria
- Cyanobacteria
- Other Bacteria
- Eukaryotes, origin "eukaryotic"
- Eukaryotes, origin "mitochondrial"
- Eukaryotes, origin "plastidial"
- Eukaryotes, origin "bacterial/organellar"
- Eukaryotes, origin "unclear"

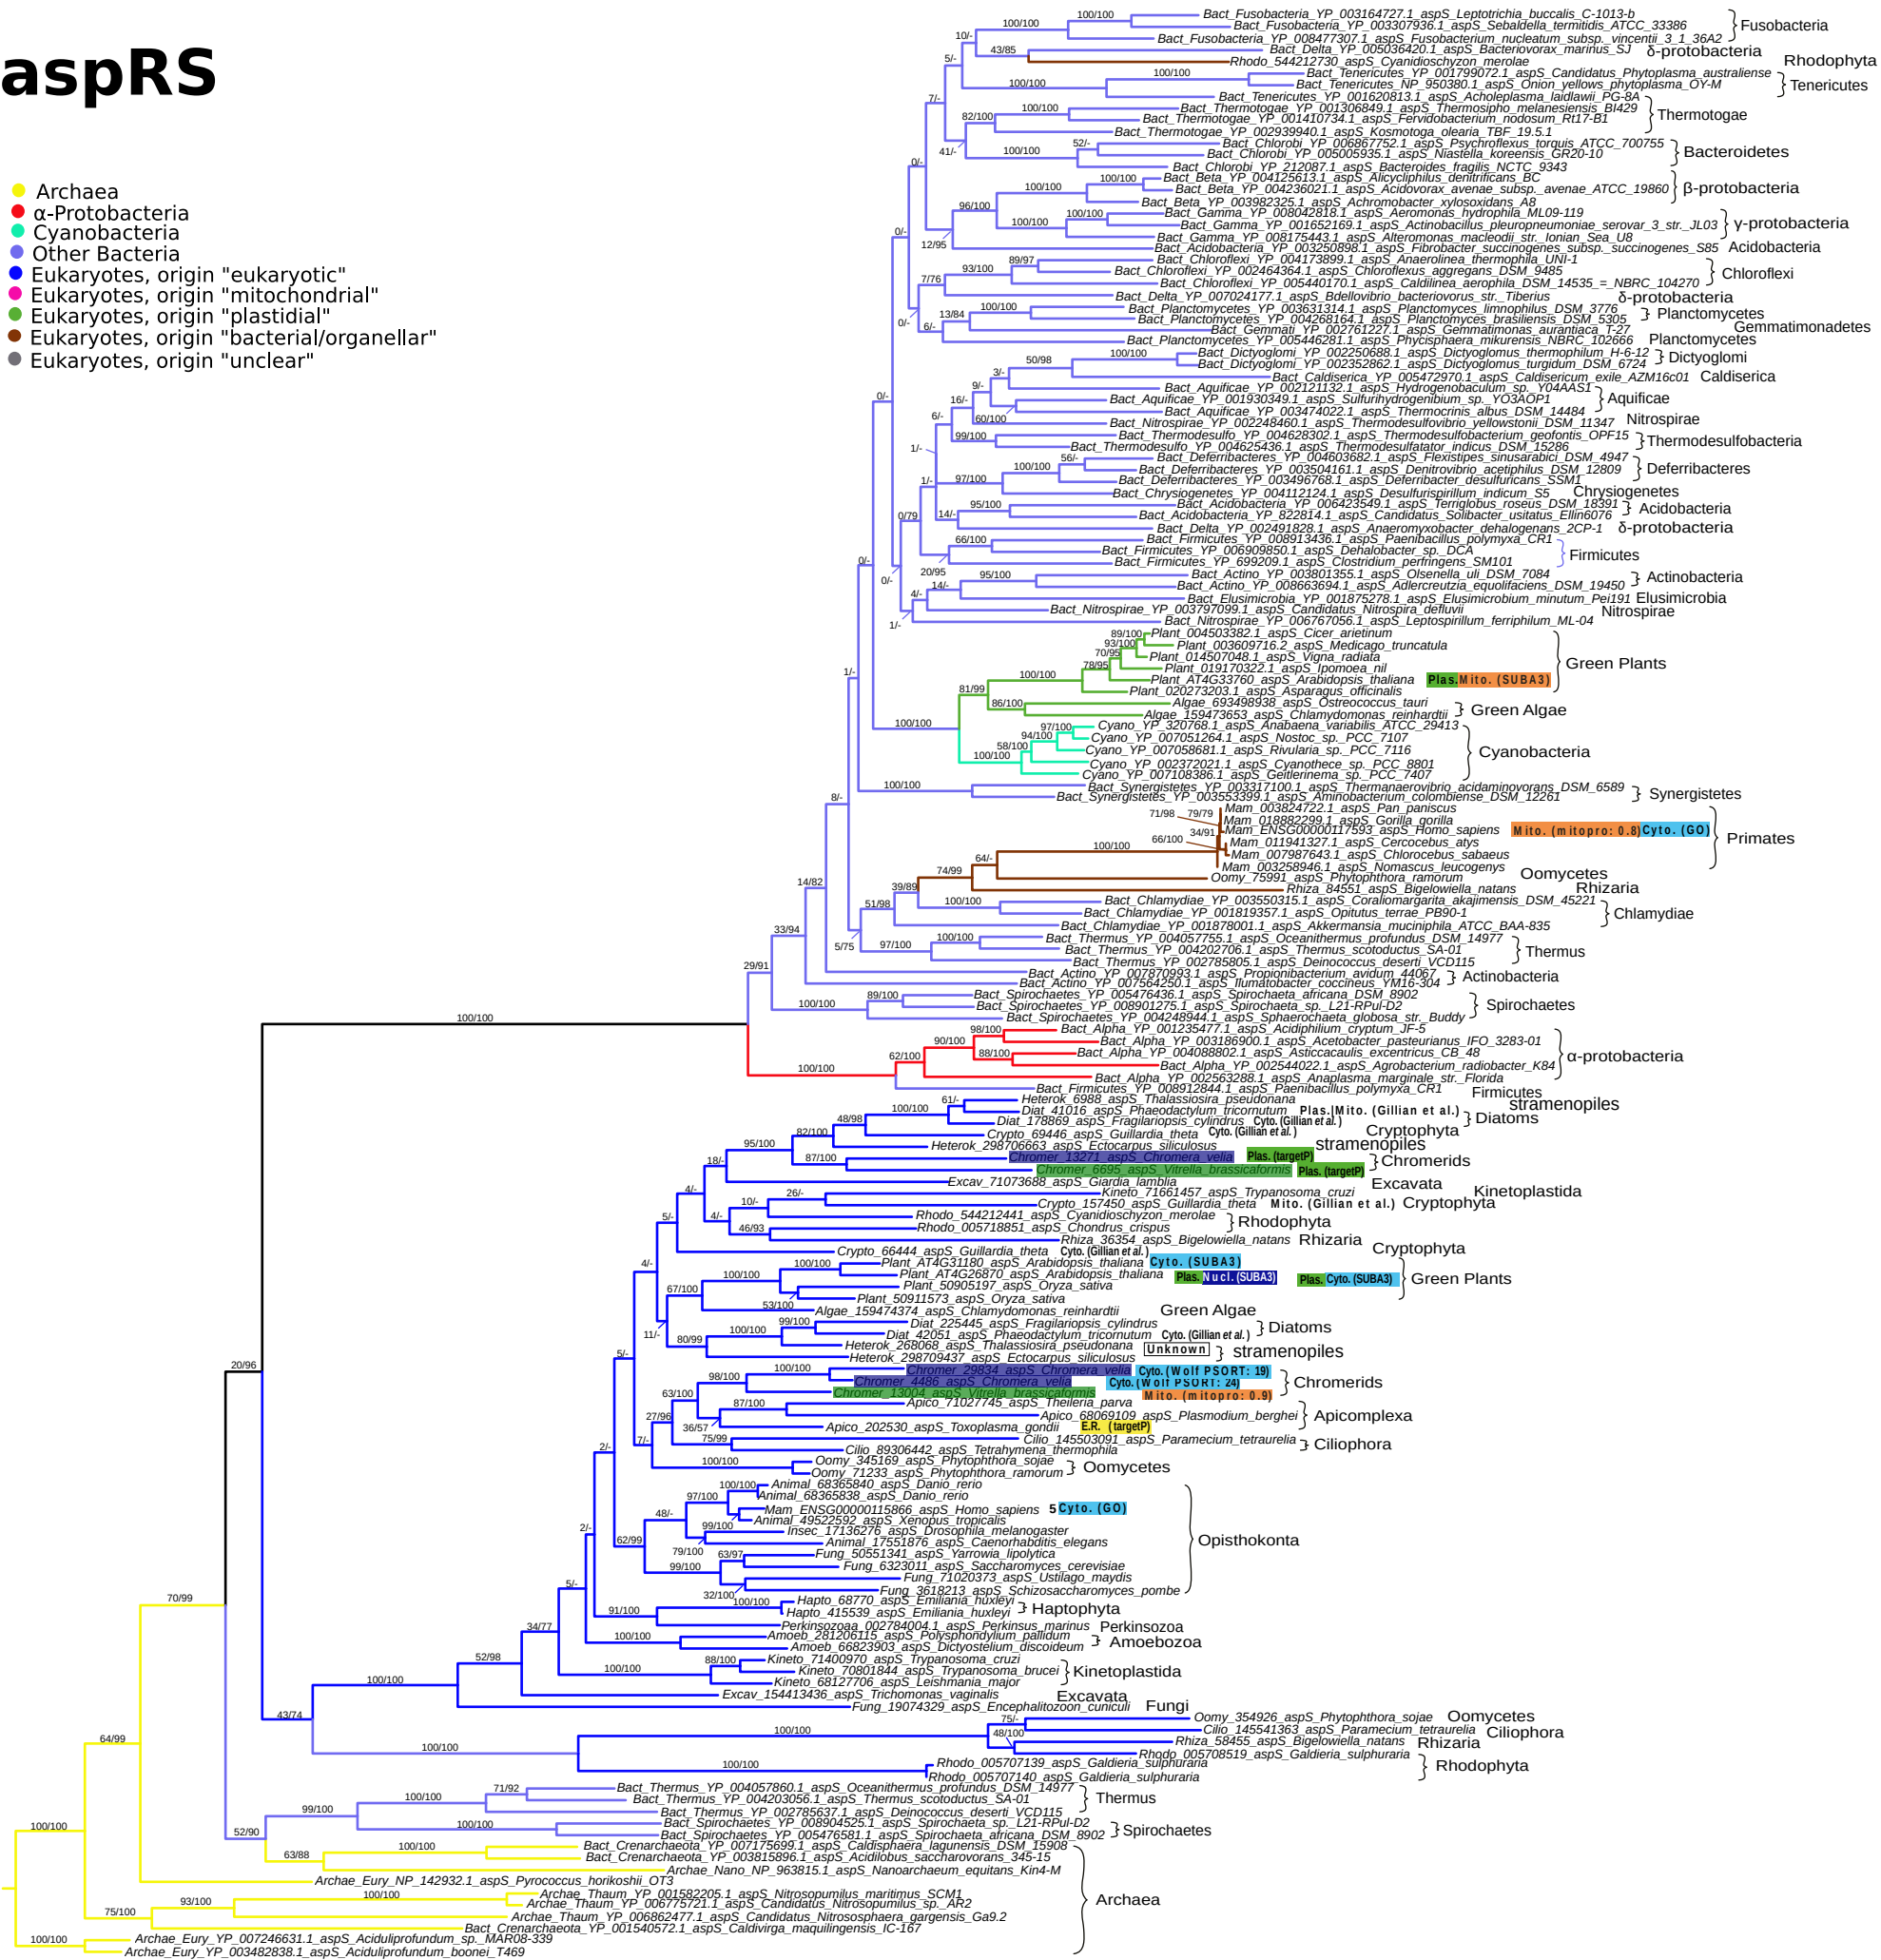

asnRS

- Archaea
- α-Protobacteria
- Cyanobacteria
- Other Bacteria
- Eukaryotes, origin "eukaryotic"
- Eukaryotes, origin "mitochondrial"
- Eukaryotes, origin "plastidial"
- Eukaryotes, origin "bacterial/organelar"
- Eukaryotes, origin "unclear"

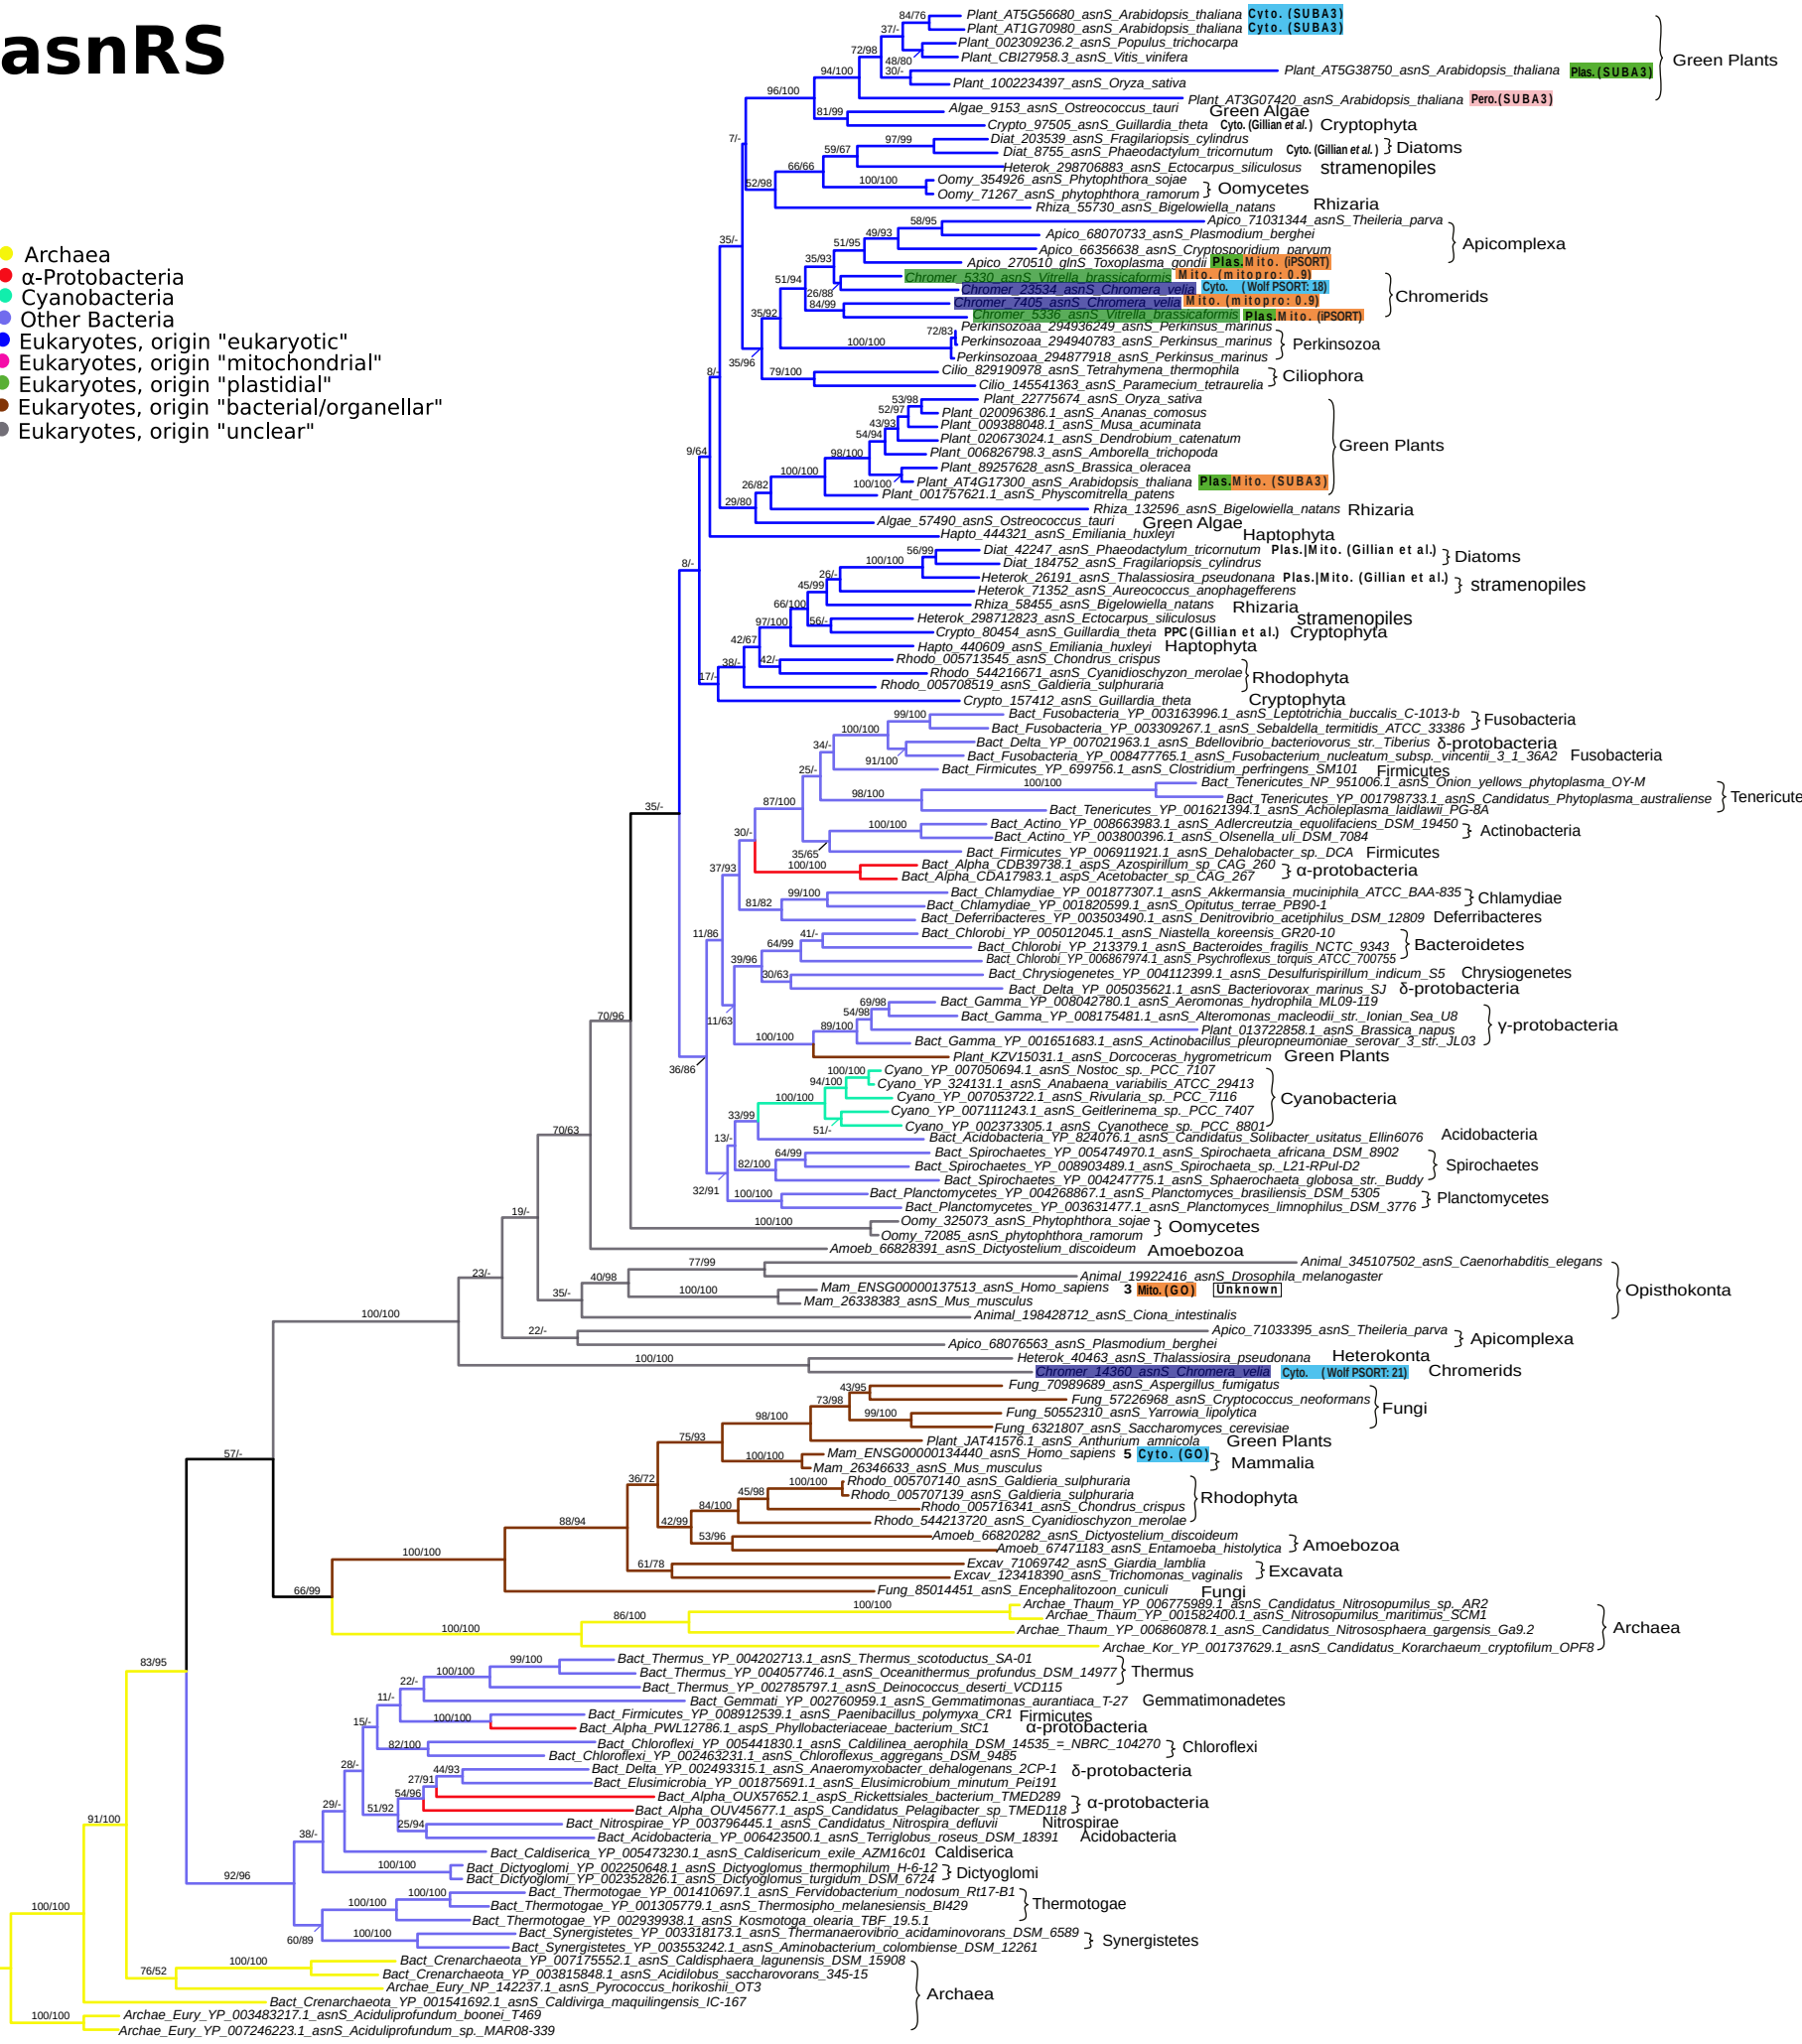

# glyRS

- Archaea
- α-Protobacteria
- Cyanobacteria
- Other Bacteria
- Eukaryotes, origin "eukaryotic"
- Eukaryotes, origin "mitochondrial"
- Eukaryotes, origin "plastidial"
- Eukaryotes, origin "bacterial/organellar"
- Eukaryotes, origin "unclear"

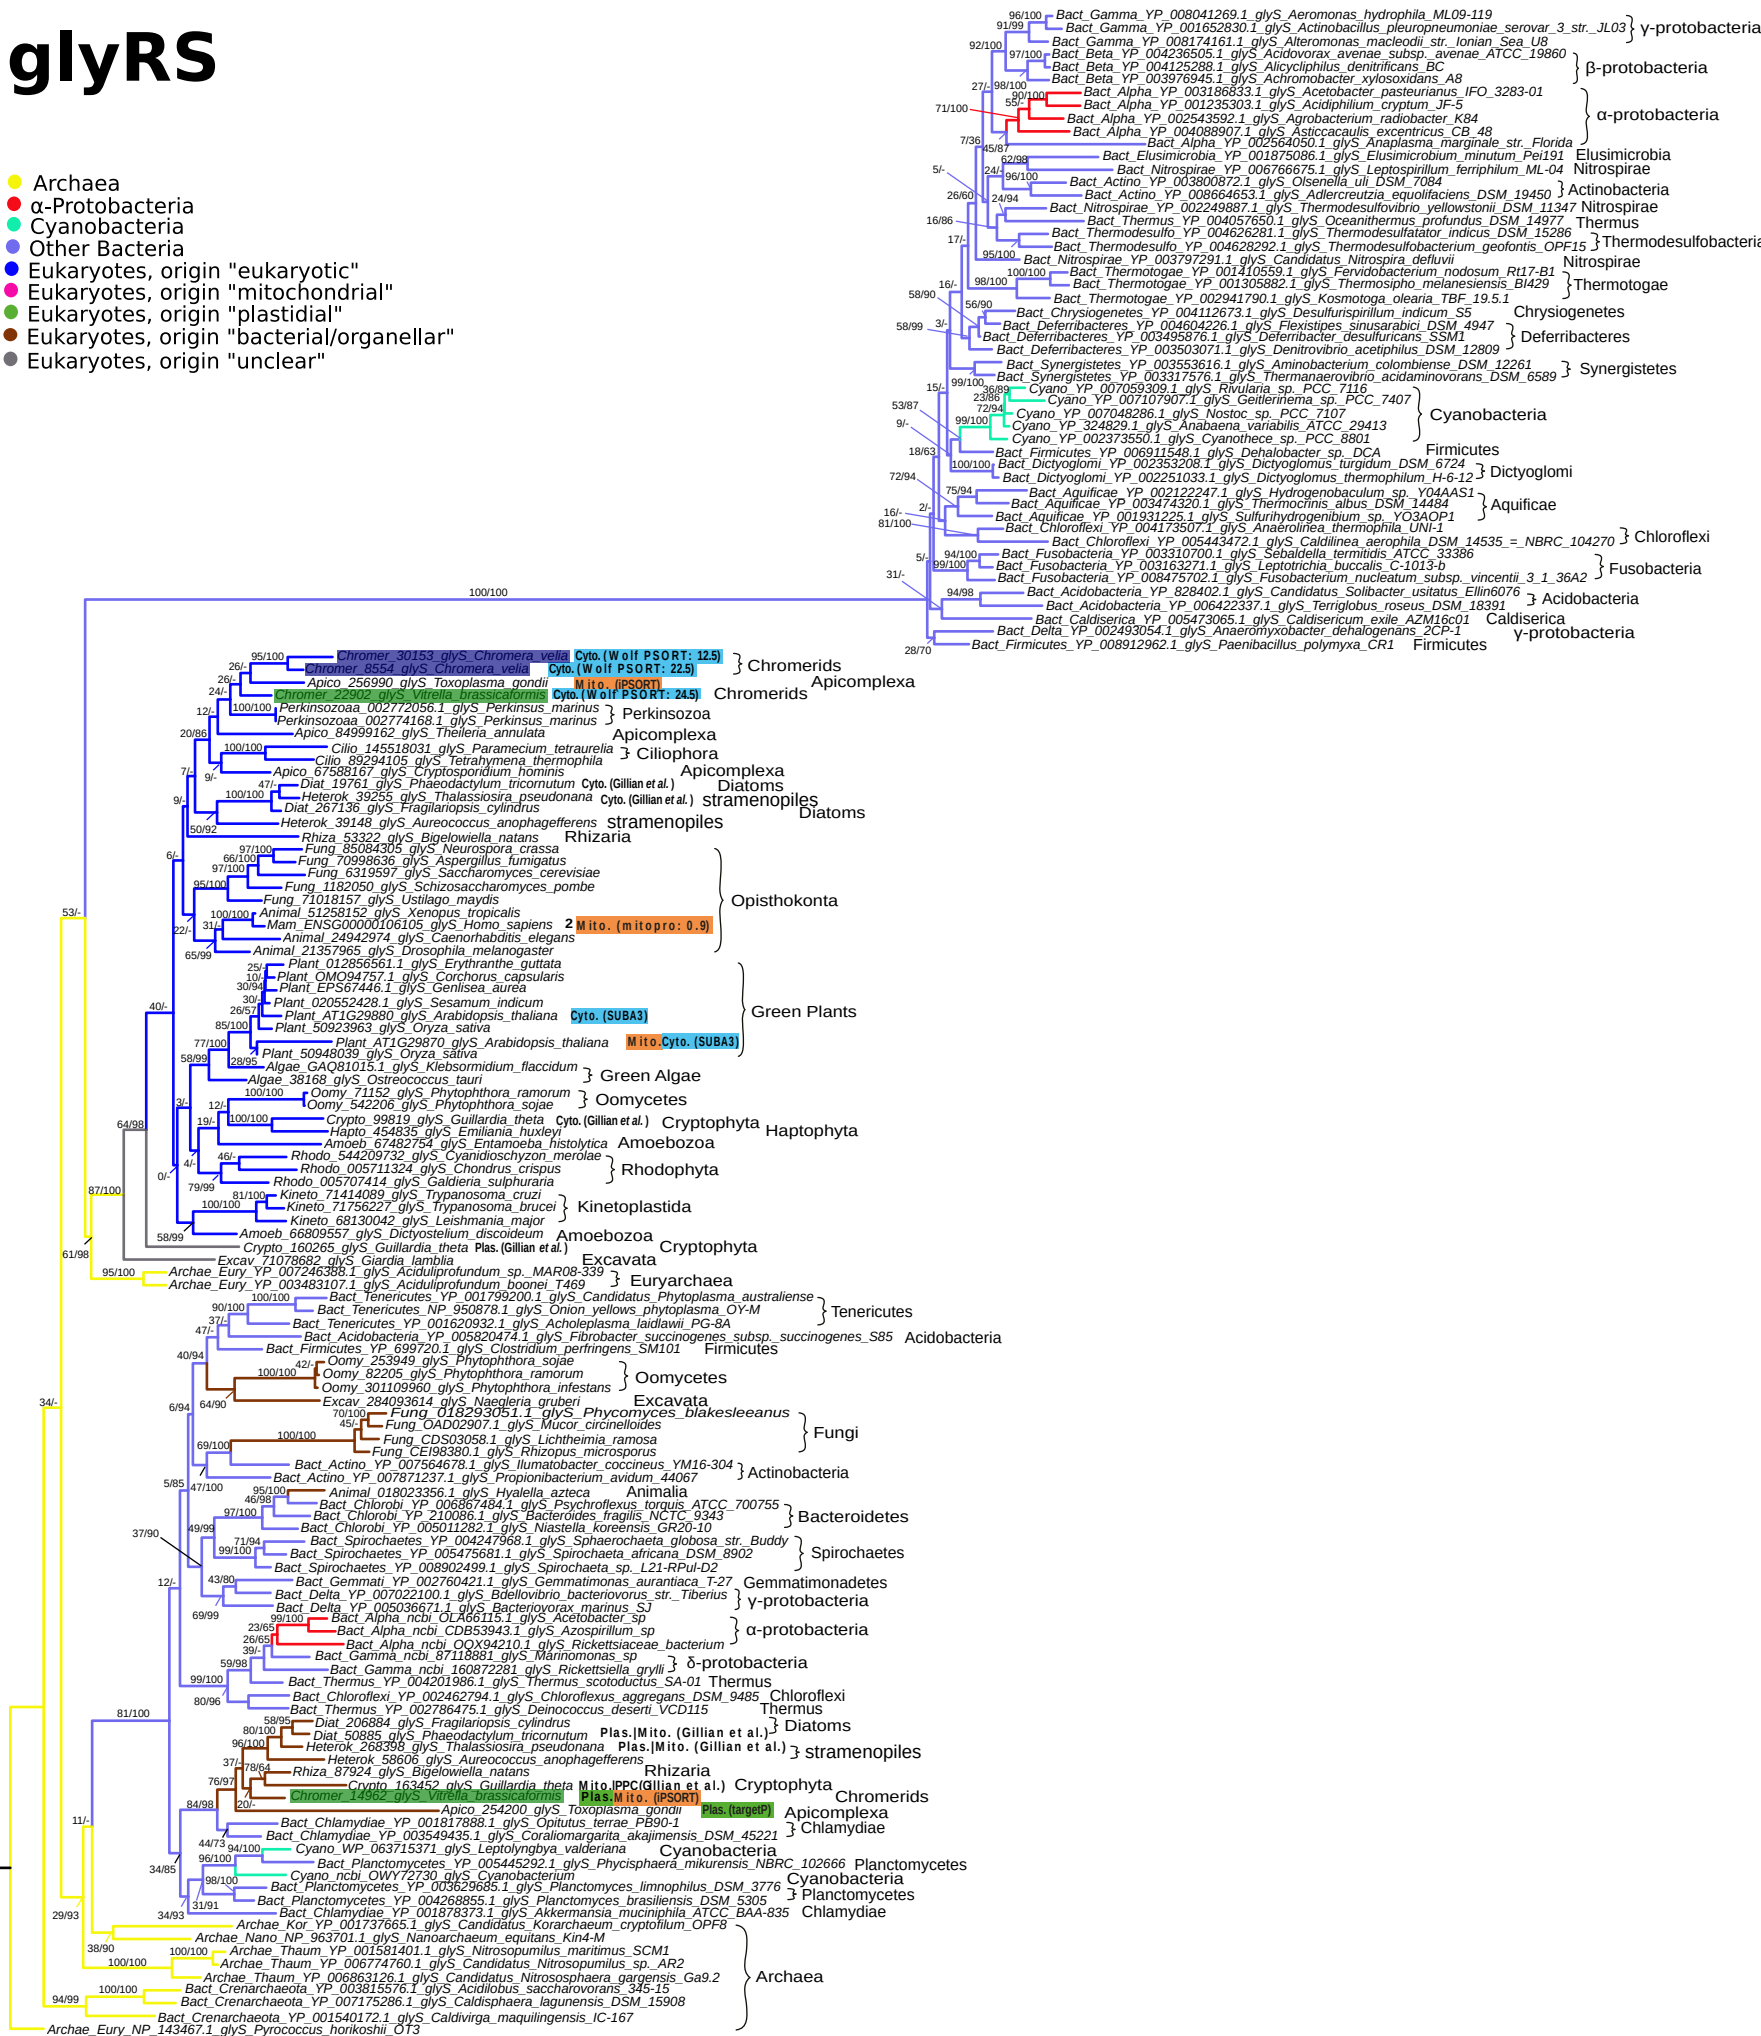

- Archaea
- α-Protobacteria
- Cyanobacteria
- Other Bacteria
- Eukaryotes, origin "eukaryotic"
- Eukaryotes, origin "mitochondrial"
- Eukaryotes, origin "plastidial"
- Eukaryotes, origin "bacterial/organelar"
- Eukaryotes, origin "unclear"

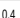

lysRS

- Archaea
- α-Protobacteria
- Cyanobacteria
- Other Bacteria
- Eukaryotes, origin "eukaryotic"
- Eukaryotes, origin "mitochondrial"
- Eukaryotes, origin "plastidial"
- Eukaryotes, origin "bacterial/organellar"
- Eukaryotes, origin "unclear"

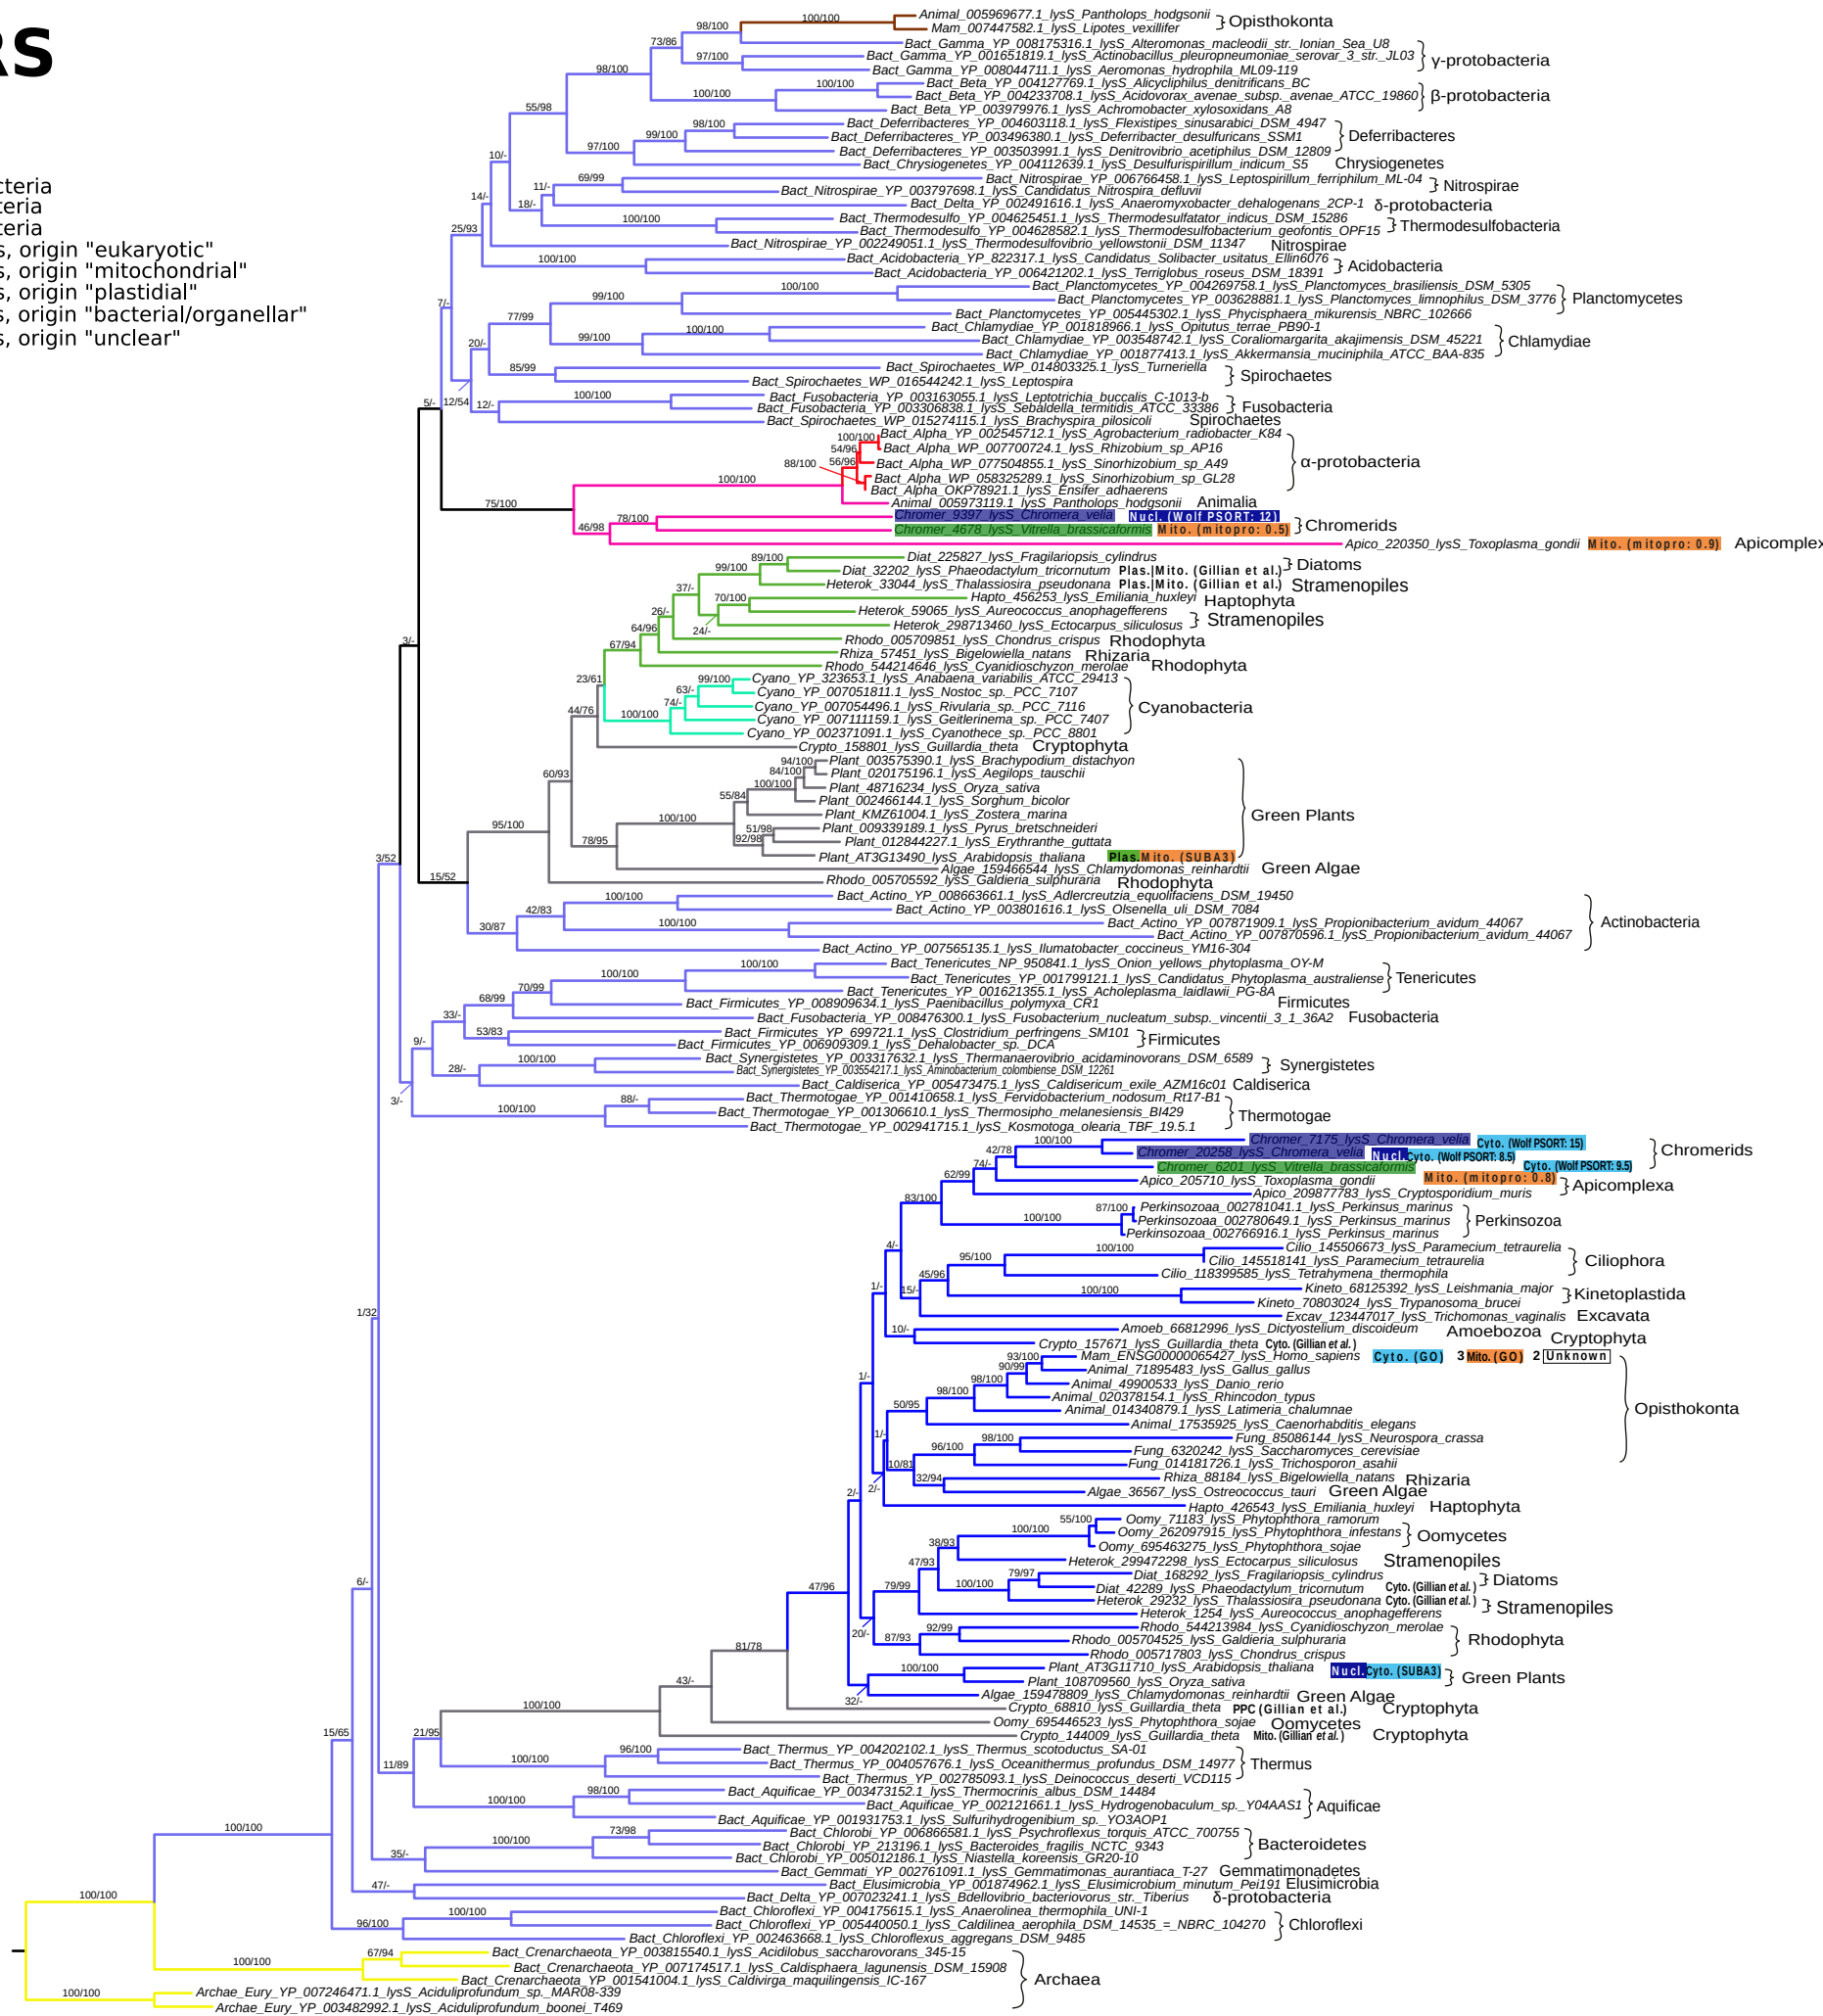

# α-pheRS

- Archaea
- α-Protobacteria
- Cyanobacteria
- Other Bacteria
- Eukaryotes, origin "eukaryotic"
- Eukaryotes, origin "mitochondrial"
- Eukaryotes, origin "plastidial"
- Eukaryotes, origin "bacterial/organellar"
- Eukaryotes, origin "unclear"

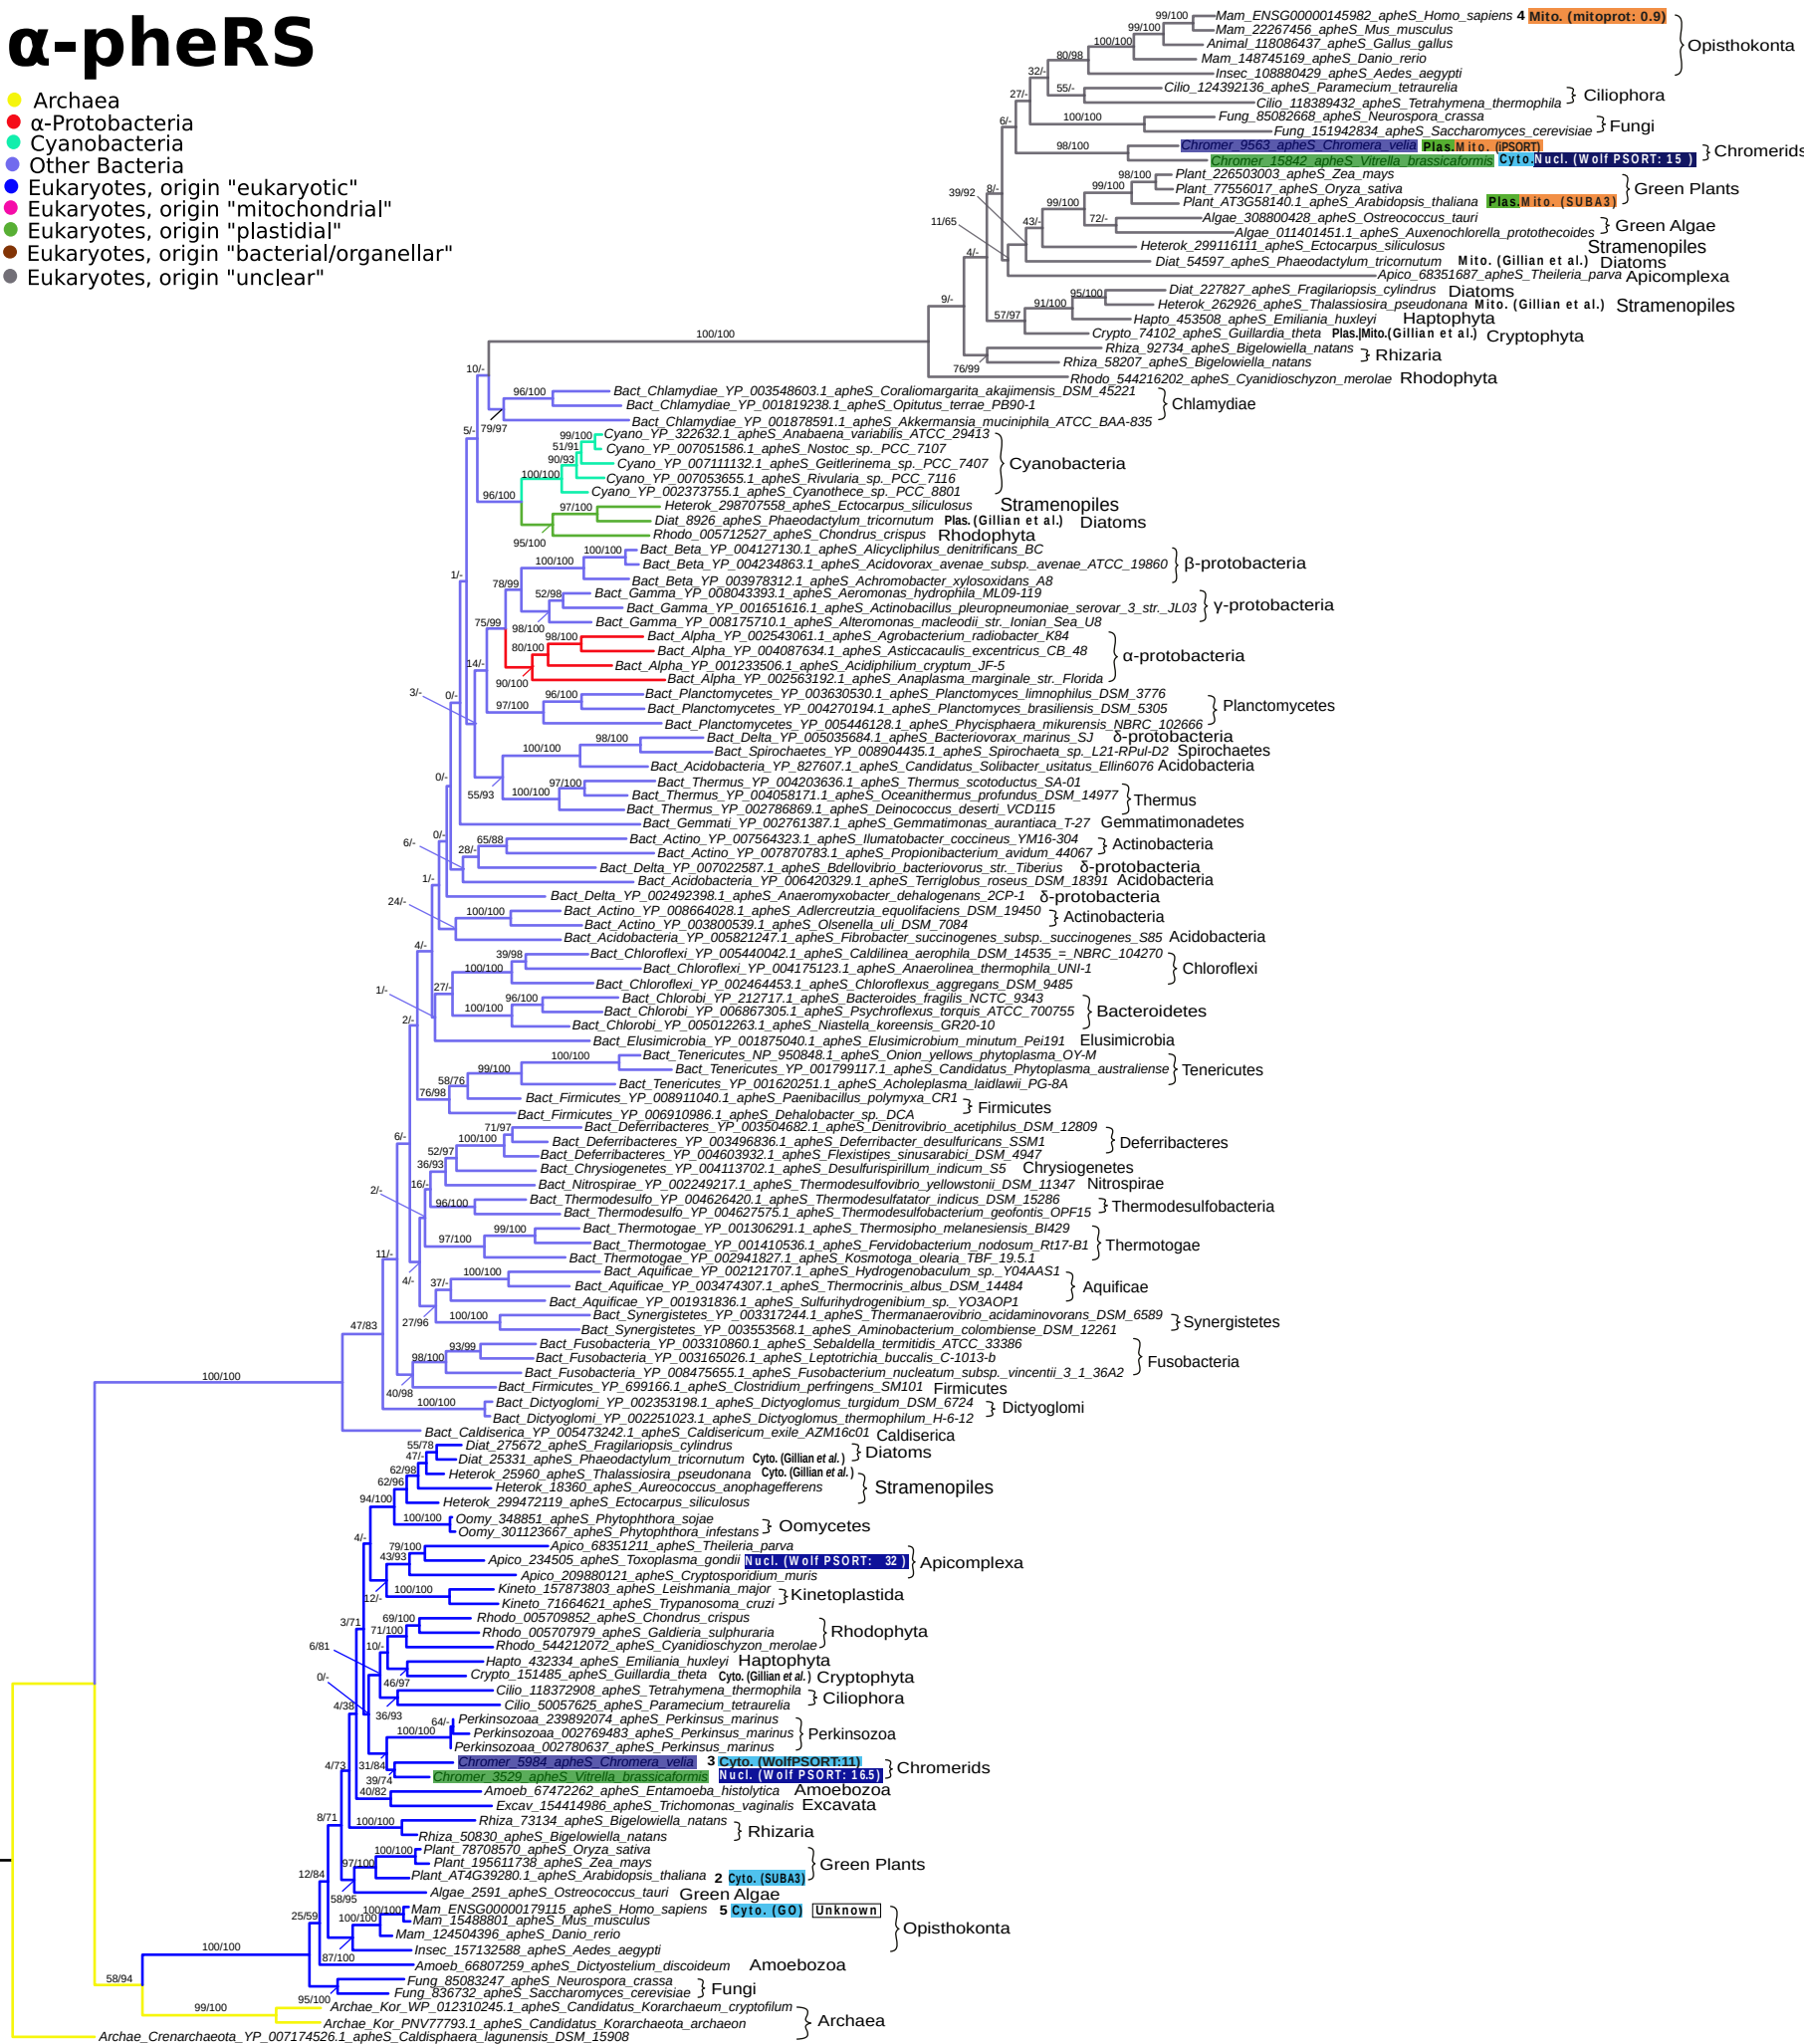

# β-pheRS

- Archaea
- α-Protobacteria
- Cyanobacteria
- Other Bacteria
- Eukaryotes, origin "eukaryotic"
- Eukaryotes, origin "mitochondrial"
- Eukaryotes, origin "plastidial"
- Eukaryotes, origin "bacterial/organelar"
- Eukaryotes, origin "unclear"

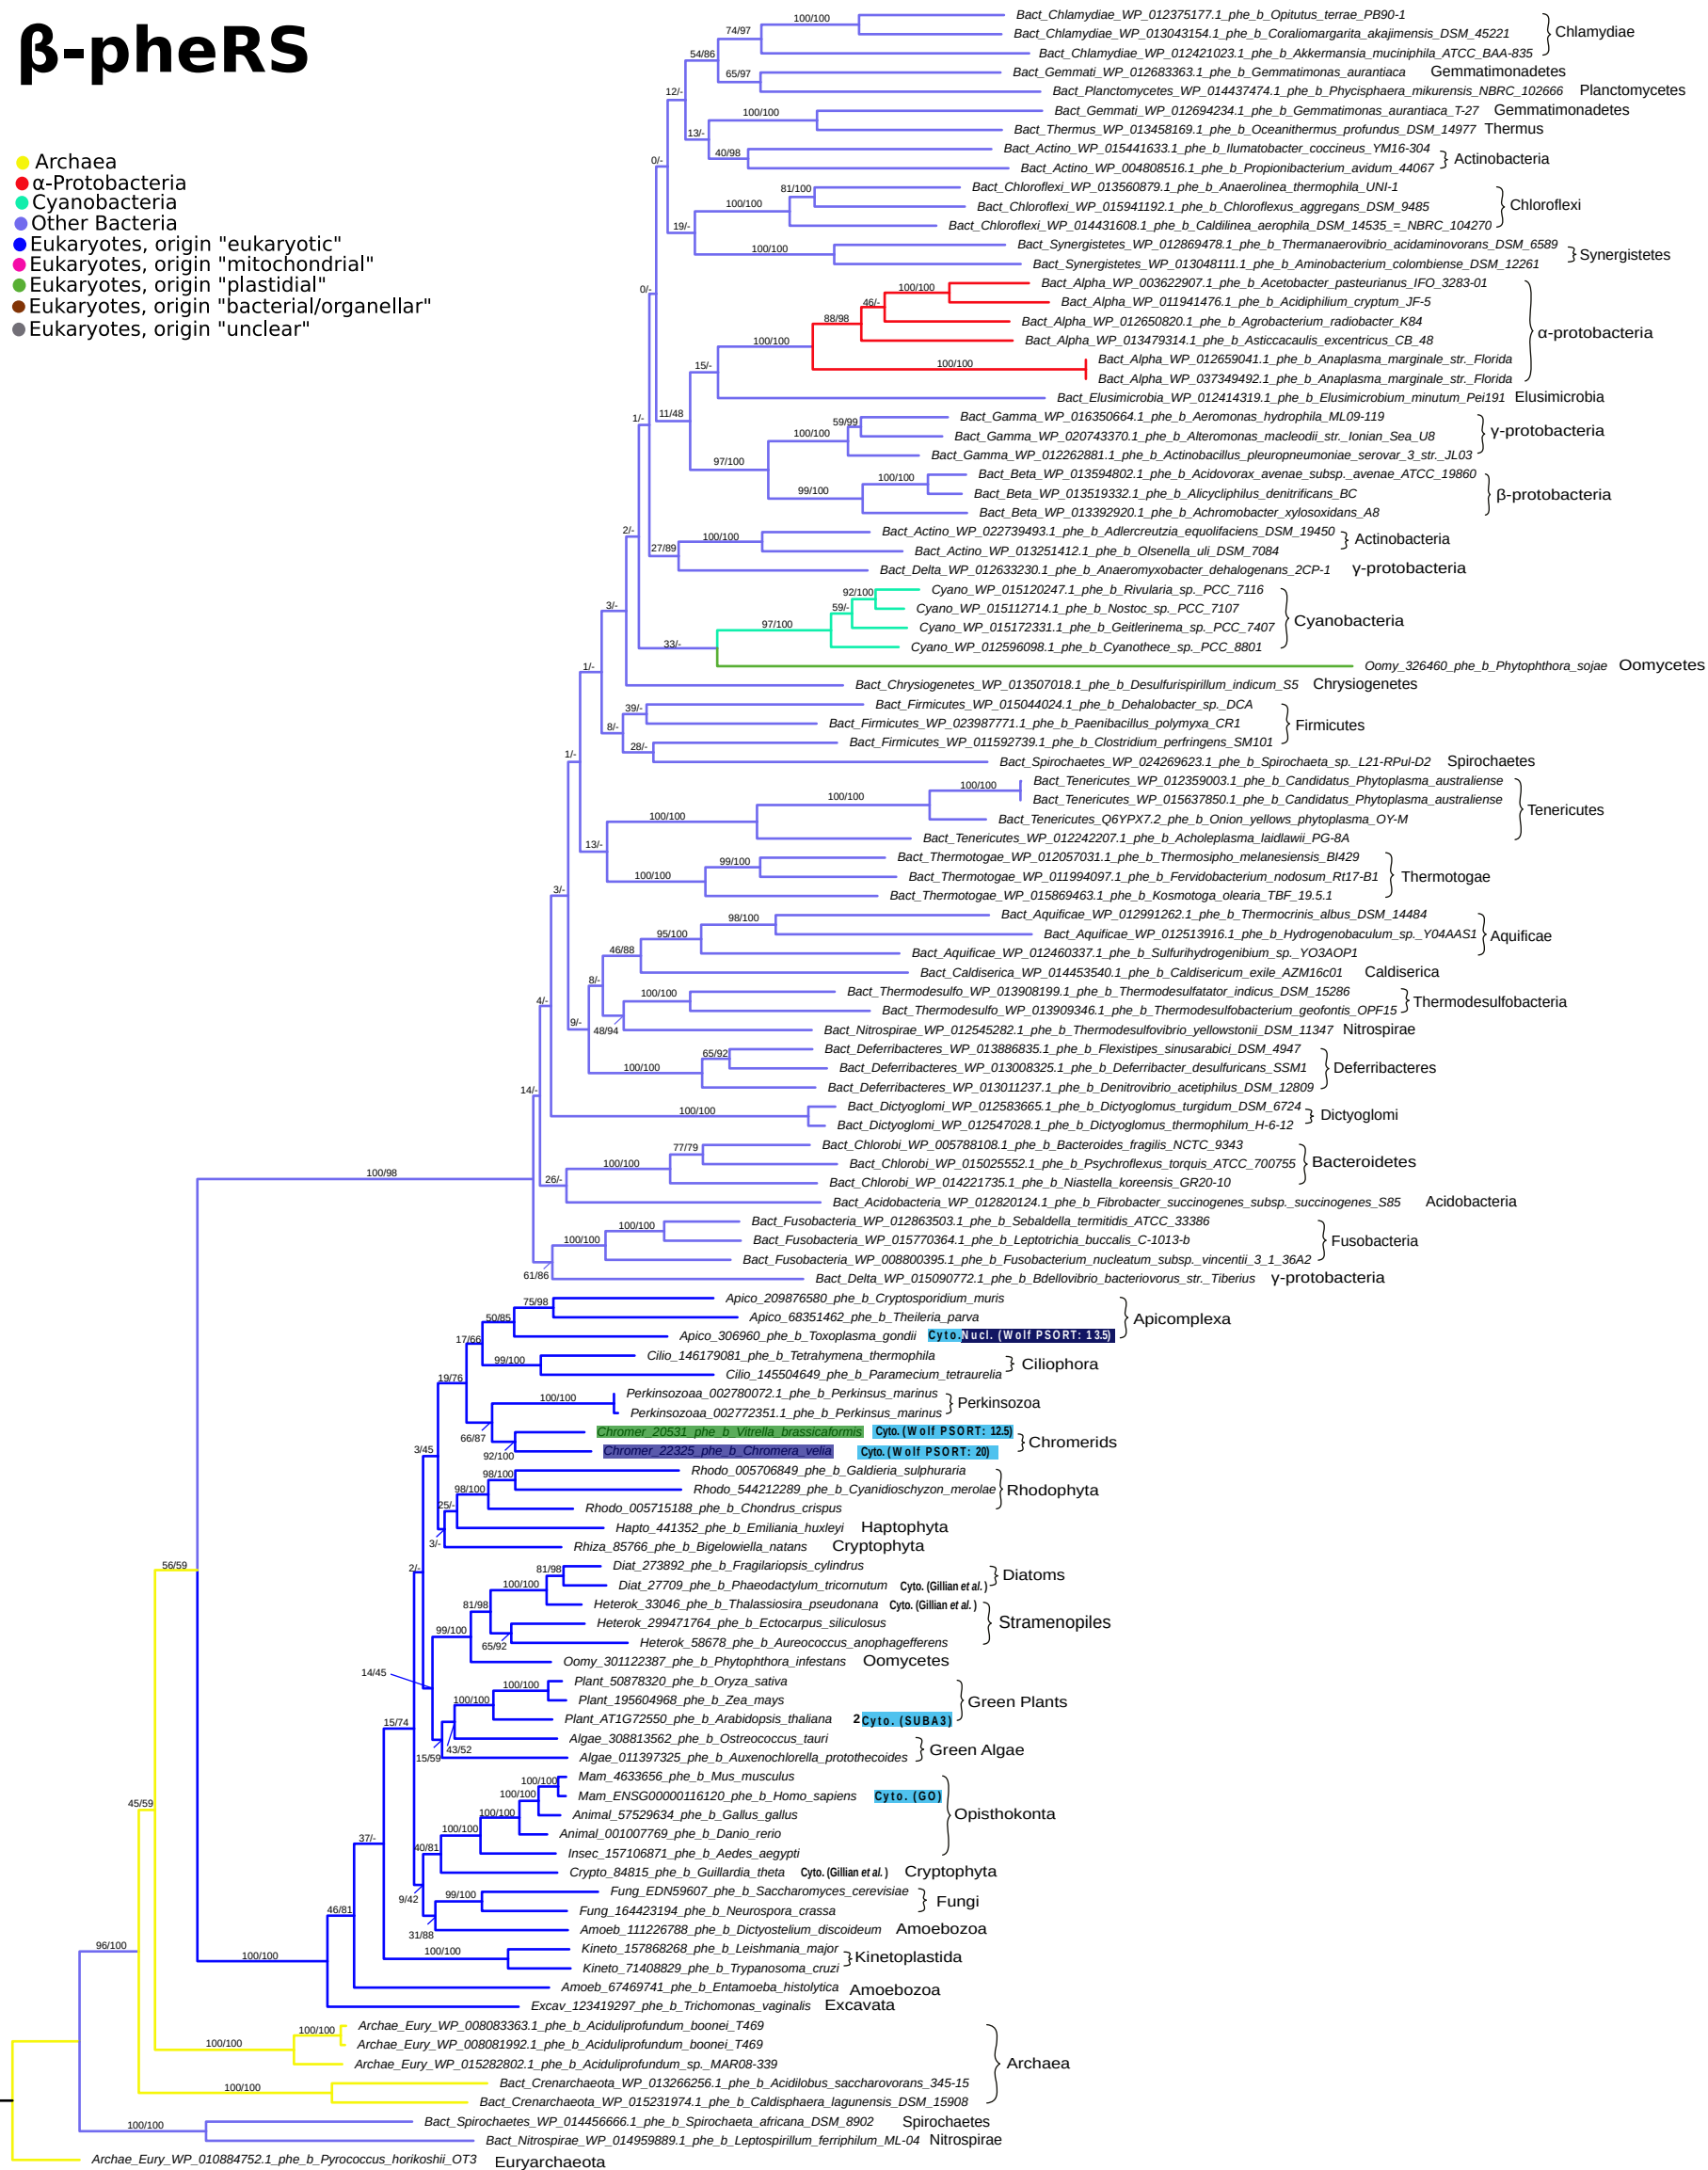

# proRS

- Archaea
- α-Protobacteria
- Cyanobacteria
- Other Bacteria
- Eukaryotes, origin "eukaryotic"
- Eukaryotes, origin "mitochondrial"
- Eukaryotes, origin "plastidial"
- Eukaryotes, origin "bacterial/organelar"
- Eukaryotes origin "unclear"

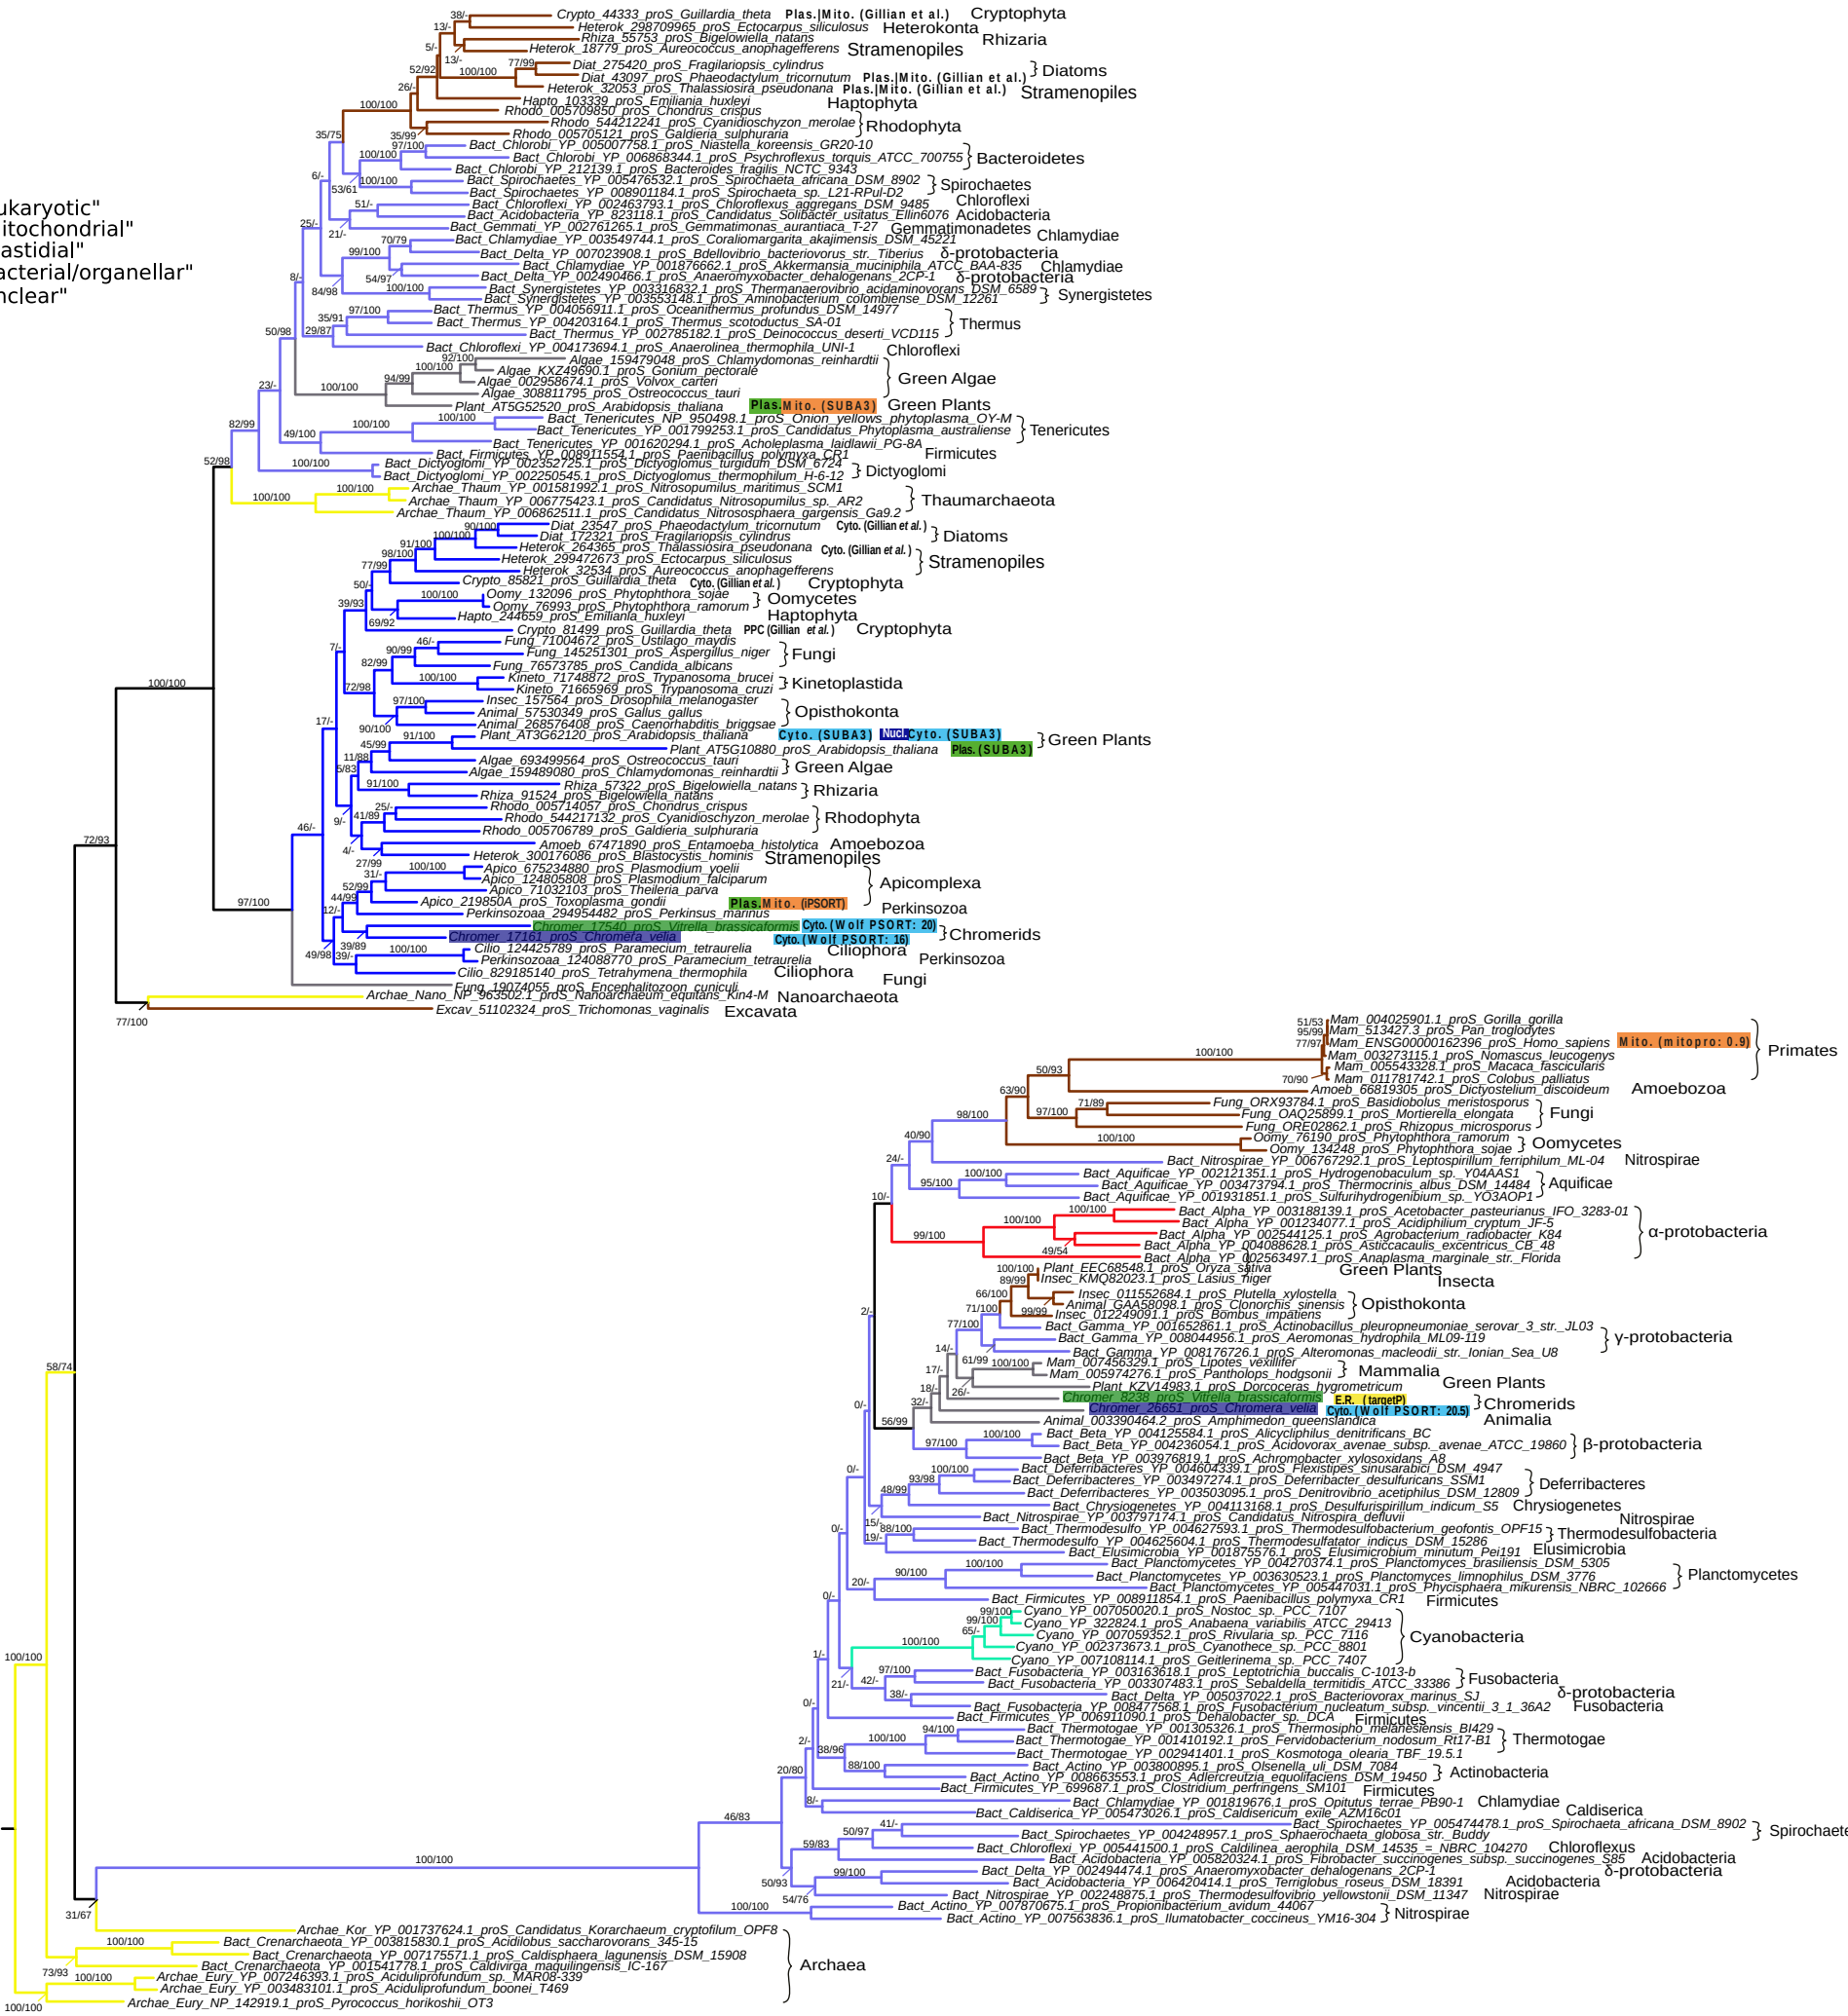

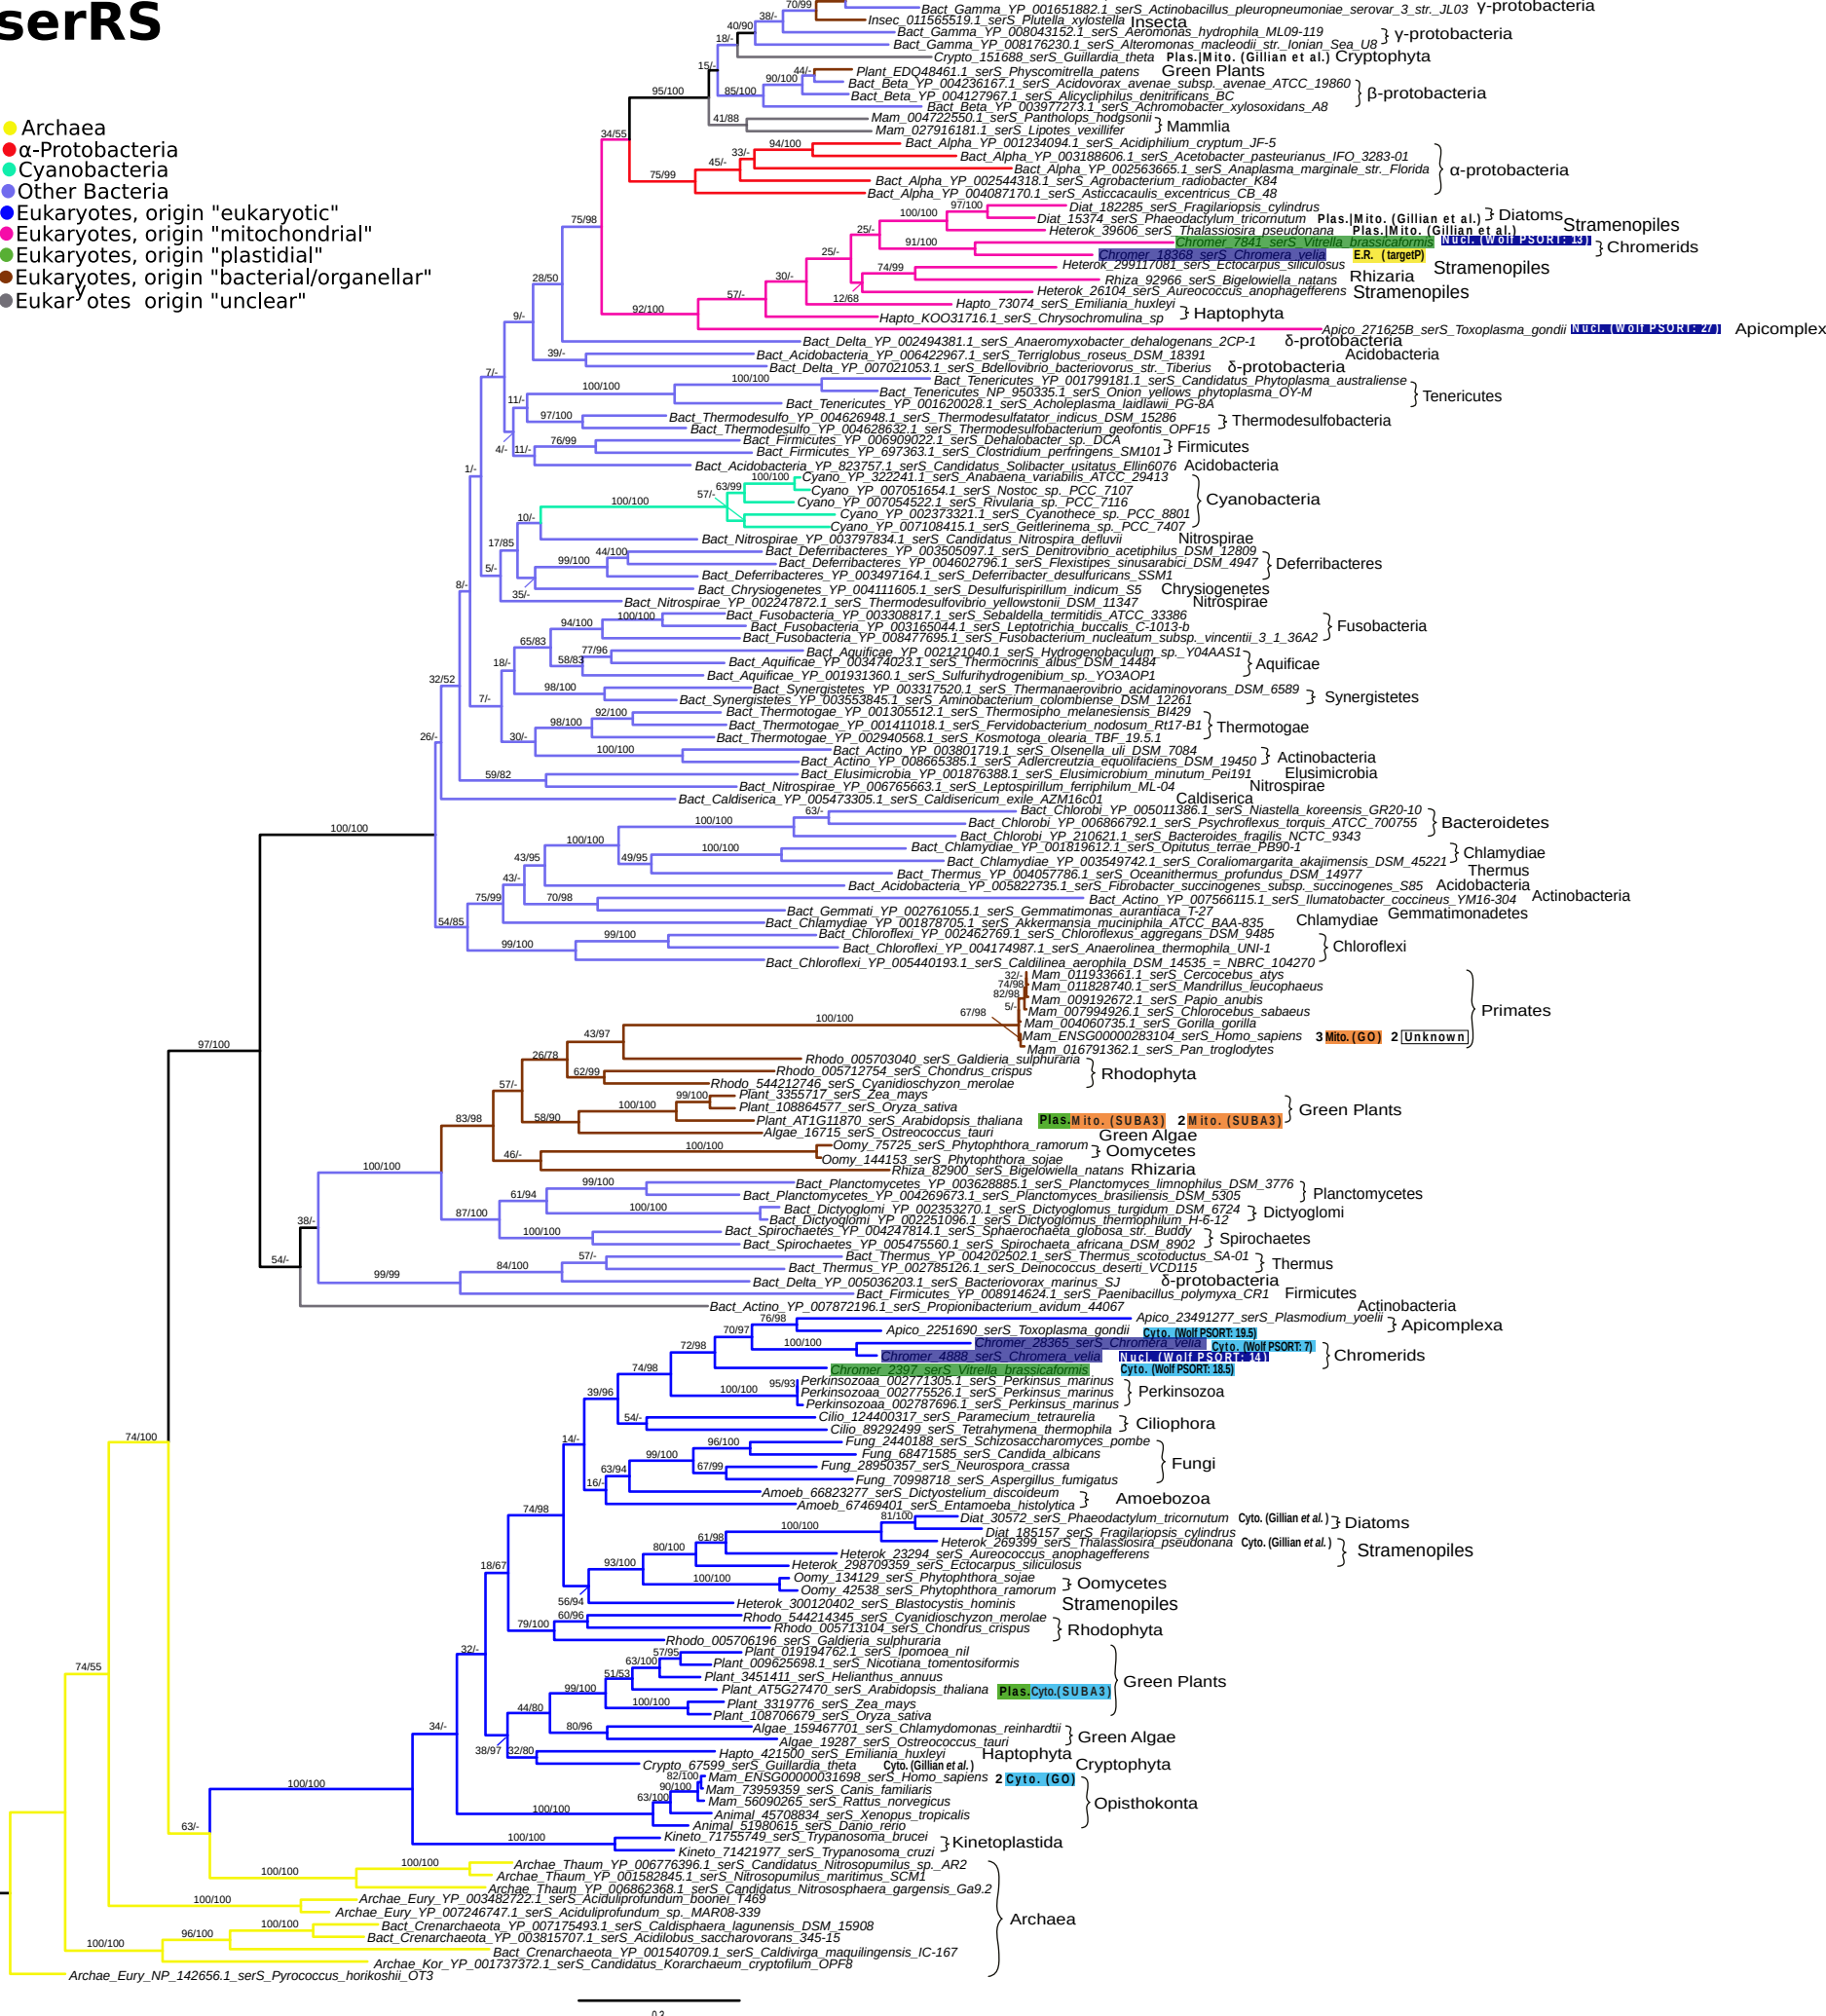

- Archaea
- α-Protobacteria
- Cyanobacteria
- Other Bacteria
- Eukaryotes, origin "eukaryotic"
- Eukaryotes, origin "mitochondrial"
- Eukaryotes, origin "plastidial"
- Eukaryotes, origin "bacterial/organellar"
- Eukaryotes, origin "unclear"

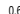

Supplement: s1 [file s1]
